1 **IL-1-driven stromal-neutrophil interaction in deep ulcers defines a pathotype of therapy**  
2 **non-responsive inflammatory bowel disease**

3  
4 Matthias Friedrich<sup>1,16</sup>, Mathilde Pohin<sup>1,16</sup>, Matthew A. Jackson<sup>1,16</sup>, Ilya Korsunsky<sup>2,3,4,5</sup>, Samuel  
5 Bullers<sup>1</sup>, Kevin Rue-Albrecht<sup>1</sup>, Zoe Christoforidou<sup>6</sup>, Dharshan Sathananthan<sup>7</sup>, Rahul  
6 Ravindran<sup>7</sup>, Raphael Sanches Peres<sup>1</sup>, Hannah Sharpe<sup>8</sup>, Kevin Wei<sup>9</sup>, Gerald F. M. Watts<sup>9</sup>,  
7 Elizabeth H. Mann<sup>1</sup>, Alessandra Geremia<sup>7</sup>, Tom Thomas<sup>7</sup>, Moustafa Attar<sup>1,10</sup>, Oxford IBD  
8 Cohort Investigators<sup>11</sup>, Roche Fibroblast Network Consortium<sup>12,13</sup>, Sarah McCuaig<sup>1</sup>, Lloyd  
9 Thomas<sup>7</sup>, Elena Collantes<sup>7</sup>, Holm H. Uhlig<sup>7</sup>, Stephen Sansom<sup>1</sup>, Alistair Easton<sup>14</sup>, Soumya  
10 Raychaudhuri<sup>2,3,4,5,9,15</sup>, Simon P. Travis<sup>7</sup>, Fiona M. Powrie<sup>1,17</sup>

11 <sup>1</sup>Kennedy Institute of Rheumatology, Nuffield Department of Orthopaedics, Rheumatology  
12 and Musculoskeletal Science, University of Oxford, Oxford OX3 7FY, United Kingdom

13 <sup>2</sup>Center for Data Sciences, Brigham and Women's Hospital, Boston, MA 02115, USA

14 <sup>3</sup>Division of Genetics, Department of Medicine, Brigham and Women's Hospital, Boston, MA  
15 02115, USA

16 <sup>4</sup>Department of Biomedical Informatics, Harvard Medical School, Boston, MA 02115, USA

17 <sup>5</sup>Program in Medical and Population Genetics, Broad Institute of MIT and Harvard, Cambridge,  
18 MA 02142, USA

19 <sup>6</sup>MRC Weatherall Institute of Molecular Medicine, Radcliffe Department of Medicine,  
20 University of Oxford, John Radcliffe Hospital, Oxford OX3 9DS, United Kingdom

21 <sup>7</sup>Translational Gastroenterology Unit, NIHR Oxford Biomedical Research Centre, Oxford  
22 University Hospitals NHS Foundation Trust, John Radcliffe Hospital, Oxford OX3 9DU, United  
23 Kingdom

24 <sup>8</sup>Jenner Institute, Nuffield Department of Medicine, University of Oxford, Oxford OX3 7FY,  
25 United Kingdom

26 <sup>9</sup>Division of Rheumatology, Inflammation and Immunity, Department of Medicine, Brigham and  
27 Women's Hospital and Harvard Medical School, Boston, MA, USA

28 <sup>10</sup>The Wellcome Trust Centre for Human Genetics, University of Oxford, Oxford OX3 7FY,  
29 United Kingdom

30 <sup>11</sup>Oxford IBD cohort investigators: Dr Carolina Arancibia, Dr Adam Bailey, Professor Ellie  
31 Barnes, Dr Elizabeth Bird-Lieberman, Dr Oliver Brain, Dr Barbara Braden, Dr Jane Collier,  
32 Professor James East, Dr Lucy Howarth, Professor Paul Klenerman, Professor Simon

33 Leedham, Dr Rebecca Palmer, Dr Fiona Powrie, Dr Astor Rodrigues, Professor Alison  
34 Simmons, Dr Peter Sullivan, Professor Holm Uhlig, Professor Jack Satsangi, Dr Philip Allan,  
35 Dr Timothy Ambrose, Dr Jan Bornschein, Dr Jeremy Cobbold, Dr Emma Culver, Dr Michael  
36 Pavlides, Dr Alissa Walsh

37 <sup>12</sup>Roche Fibroblast Network Consortium: Kevin Wei, Ilya Korsunsky, Francesca Barone,  
38 Michael Brenner, Chris Buckley, Mark Coles, Andreas P. Frei, Kara G. Lassen, Fiona Powrie,  
39 Soumya Raychaudhuri

40 <sup>13</sup>Roche Pharma Research and Early Development, Immunology, Infectious Diseases and  
41 Ophthalmology (I2O) Discovery and Translational Area, Roche Innovation Center Basel,  
42 Basel, Switzerland

43 <sup>14</sup>Old Road Campus Research Building, Department of Oncology, Medical Sciences Division,  
44 University of Oxford, Oxford OX3 7FY, United Kingdom

45 <sup>15</sup>Centre for Genetics and Genomics Versus Arthritis, Manchester Academic Health Science  
46 Centre, University of Manchester, Manchester, UK

47 <sup>16</sup>These authors contributed equally.

48 <sup>17</sup>Lead contact, corresponding author (fiona.powrie@kennedy.ox.ac.uk)

49

50

51

52

53

54

55

56

57

58

59

60

61

62 **Abstract**

63 Current inflammatory bowel disease (IBD) therapies are ineffective in a high proportion of  
64 patients. Combining bulk and single-cell transcriptomics, quantitative histopathology, and *in*  
65 *situ* localisation, we describe heterogeneity of the tissular inflammatory response in IBD  
66 treatment failure. Among inflammatory pathotypes, we found high neutrophil infiltration,  
67 activation of fibroblasts, and vascular remodelling at sites of deep ulceration was a feature of  
68 non-response to several anti-inflammatory therapies. Activated fibroblasts in the ulcer bed  
69 display neutrophil chemoattractant properties that are IL-1R- but not TNF-dependent. The  
70 identification of distinct, localised, tissular pathotypes associated with treatment non- response  
71 will aid precision targeting of current therapeutics and provide a biological rationale for IL-1  
72 signalling blockade in ulcerating disease.

73

74

75 **Keywords:** inflammatory, bowel, therapy, non-response, anti-TNF, IL-1, stroma, neutrophil,  
76 single-cell, fibroblast, colitis, Crohn's, ulceration, pathotype, heterogeneity, lymphoid,  
77 aggregate

78

79

80

81

82

83

84

85

## 86 **Introduction**

87 Inflammatory bowel diseases (IBDs) are a heterogeneous group of disorders characterised by  
88 inflammation throughout the gastrointestinal tract. The aetiology involves maladaptation  
89 between the host and its intestinal microbiota, a dialogue controlled by genetic and  
90 environmental factors <sup>1</sup>. The complex multi-factorial nature of IBD is partly reflected in its  
91 clinical phenotypes, encompassing both Crohn's disease (CD) and ulcerative colitis (UC), and  
92 in a range of microscopic features such as granulomas, lymphoid aggregates, crypt  
93 abscesses, and ulcers <sup>2,3</sup>. Treatments for IBD include general immunosuppressants (such as  
94 corticosteroids), immunomodulators (such as thiopurines), or biologics that target specific  
95 inflammatory mediators <sup>4</sup>. Amongst the latter, tumor necrosis factor  $\alpha$  (TNF) targeting is most  
96 common <sup>5</sup> but alternate approaches, such as blockade of leukocyte homing to the gut (anti-  
97 integrin  $\alpha 4\beta 7$  (vedolizumab)) are increasingly used <sup>6</sup>. Although anti-TNF therapy has  
98 revolutionised the treatment of IBD, identifying the patients who will respond remains a major  
99 challenge. Up to 40% of IBD patients are primary non-responders and for a substantial fraction  
100 of initial responders, treatment will later lose efficacy <sup>7-9</sup>.

101 Our previous work identified high expression of the IL-6 family member Oncostatin M (OSM),  
102 and its receptor OSMR, in the inflamed intestine of IBD patients as associated with non-  
103 response to anti-TNF therapy <sup>10</sup>. Notably, OSM produced by leukocytes signals primarily into  
104 stromal cells such as fibroblasts and endothelial cells. Subsequent bulk and single-cell  
105 transcriptomic studies have associated cell subsets of fibroblasts, inflammatory mononuclear  
106 phagocytes (MNP), neutrophils, and pathogenic T- and plasma cells with therapy non-  
107 response in both UC and CD <sup>11-17</sup>. However, these studies have not identified the processes  
108 underlying quantitative changes in cellular ecology nor how they affect treatment response. It  
109 is also not known whether the cellular and molecular determinants of treatment response are  
110 uniform across non-responsive patients or if several different tissular pathologies promote  
111 therapy failure through distinct mechanisms. Similarly, little is known about the mechanistic  
112 determinants of therapy response that are shared/unique to individual drugs. Further

113 understanding in these areas is crucial to design personalised treatment regimens and new  
114 therapeutics for individuals that do not respond to current options.

115 In this study we dissected the cellular and molecular landscape of inflamed tissue in IBD  
116 patients by integrating whole-tissue and single-cell gene expression profiling with quantitative  
117 *in situ* analyses and functional *ex vivo* assays. We then explored how individual signatures of  
118 tissue inflammation associate with non-response to specific treatments. Transcriptomic  
119 changes were found to reflect changes in the tissular response and characterised by distinct  
120 histological features. Most notably we identified a pathotype in a subset of patients that was  
121 associated with non-response across several current IBD therapeutics. Tissues from those  
122 patients are characterised by a high abundance of tissue neutrophils, the activation of a  
123 neutrophil-attractant program in fibroblasts, (peri-) vascular cell expansion, and enhanced IL-  
124 1 signalling at sites of deep ulceration. These functional definitions of disease provide a basis  
125 for rational targeting of existing medications and a novel mechanistic avenue to target  
126 inflammation in non-responsive patients displaying ulceration with fibroblast and neutrophil  
127 remodelling.

## 128 **Results**

### 129 **Identification of gene co-expression signatures of cellular ecology in inflamed IBD** 130 **tissue**

131 The surgical removal of inflamed tissue becomes a therapeutic option in IBD when medical  
132 therapies have failed. Using such tissues as our discovery cohort, we examined gene  
133 expression profiles in difficult-to-treat IBD. From the 31 IBD patients (n=8 UC, n=22 CD and  
134 n=1 IBDu) from which samples were collected, only 20% were treatment-naïve (i.e. had a  
135 resection as primary therapy for localised disease), while 48% had received two or more  
136 different medications before the time of surgery (Supplementary Table 1). Amongst the n=41  
137 tissue samples from these patients, n=15 were classified as (macroscopically) uninfamed,  
138 including n=7 samples for which paired uninfamed/infamed tissue was available. We

139 additionally used unaffected, non-tumour tissue collected from colorectal cancer patients  
140 undergoing surgery as non-IBD controls for comparison (n=39). Bulk RNA sequencing  
141 (RNAseq) was used to generate whole tissue gene expression profiles across all samples  
142 (n=41 IBD and n=39 non-IBD; 'discovery cohort').

143 To identify sets of genes reflective of distinct biological processes, we applied weighted gene  
144 correlation network analysis (WGCNA) to cluster co-expressed genes in an unbiased manner  
145 across all tissue samples. This identified 38 modules of highly co-expressed genes (M1-M38)  
146 (Supplementary Table 2). We correlated the expression (module eigengene) of these modules  
147 with sample characteristics, clinical phenotypes and histologic (microscopic) inflammation  
148 (Nancy Index<sup>18</sup>); 28 modules were significantly associated with at least one of these measures  
149 (Figure 1A). Modules were found to have dichotomous associations with traits. About half of  
150 the modules had significant positive correlations with histologic inflammation, whilst the others  
151 had significant negative associations (Figure 1A). Fewer and less strong correlations were  
152 observed between module expression levels and other metadata, such as the intestinal  
153 sampling site or IBD subtype (CD or UC), and overall these measures displayed correlations  
154 in a similar direction to histologic inflammation. Age appeared to have similar associations as  
155 inflammation but this was an artefact of the older nature of the non-IBD samples used as  
156 controls. In a paired analyses of only inflamed and uninfamed IBD tissue samples from the  
157 same patients (n=7), the difference in expression of a module between tissue pairs remained  
158 highly correlated with the module's association with histologic inflammation (Nancy Index)  
159 (R=0.8, P<0.001, Extended Data Figure 1A), confirming that these co-expression modules  
160 reflected inflammatory processes.

161 To determine whether the gene co-expression patterns we detected reflected changes in the  
162 cell type composition of patient tissues, we applied *in silico* cell type deconvolution analysis to  
163 the RNAseq data of our discovery cohort (*xCell*,<sup>19</sup>). Correlating predicted cell type scores with  
164 module expression (eigengenes) (Extended Data Figure 1B), modules positively correlated  
165 with histologic inflammation (Figure 1A) were associated with signatures of stromal cells (e.g.,

166 fibroblasts), mononuclear phagocytes (e.g., M2 macrophages), B-lymphocytes and plasma  
167 cells, T-lymphocytes (e.g., CD8+ T-cells), and granulocytes (e.g., neutrophils). Modules  
168 negatively correlated with histologic inflammation were predicted to reflect epithelial cells,  
169 smooth muscle cells and M1 macrophages. These results suggest that the co-expression  
170 patterns that we observed to be associated with inflammation were, at least in part, being  
171 driven by differences in the cellular composition of the inflamed tissues.

## 172 **Co-expression signatures of inflammation predict patient response to IBD treatments**

173 Given previous associations between the expression of individual genes and cell types with  
174 therapy response in IBD, we aimed to determine if our inflammation-associated gene co-  
175 expression signatures represented biological features relevant to treatment outcomes. We  
176 projected all of the modules onto whole tissue gene expression data derived from prospective  
177 studies of response to anti-TNF, corticosteroid, or anti-integrin therapy<sup>15,20,21</sup>. At least 79% of  
178 the genes within each module could be identified in the three datasets, enabling accurate  
179 quantification of the modules within them (Extended Data Figure 1C and Supplementary Table  
180 3). The expression of 15 modules was significantly (adjusted  $p < 0.05$ ) higher in non-responders  
181 to anti-TNF prior to treatment (n=61 total patients in the study). Seven modules were  
182 significantly higher in non-responders (and one significantly lower) in the corticosteroid study  
183 (n=206 patients) and two modules were higher in non-response to anti-integrin therapy (n=20  
184 patients) (Supplementary Table 4).

185 Strikingly, across all three therapy-response datasets, each involving different therapeutics,  
186 modules M4 and M5 were consistently amongst the strongest associations with non-response  
187 in pre-treatment samples (Supplementary Table 4 and Figures 1B, 1C and 1D). This overall  
188 trend of increased expression in non-responders was significant in meta-analyses of both M4  
189 ( $p = 0.0025$ , standardised mean difference (SMD)=0.87, 95%CI=0.31-1.44) and M5 ( $p = 0.0123$ ,  
190 SMD = 0.88, 95%CI=0.19-1.58) across the different treatments.

191 To determine if the associations with non-response are uniform across the genes in modules  
192 M4 and M5 or driven by a small number of highly predictive genes, we compared the ability of  
193 all genes individually to predict response to anti-TNF and corticosteroid therapy. This again  
194 revealed that genes from modules M4 and M5 were amongst the top predictors of non-  
195 response to both anti-TNF and corticosteroid therapy relative to those in other modules (Figure  
196 1E, Figure 1F, Supplementary Table 5). Thus, M4 and M5 reflect a coordinated shift in the  
197 expression of all their constituent genes in relation to therapy non-response. Overall, M4 and  
198 M5 were consistently the top predictors of non-response across multiple IBD medications.

### 199 **Co-expression modules linked with therapy non-response represent distinct** 200 **histopathologic features**

201 As well as predicting therapy response, modules M4 and M5 also demonstrated the strongest  
202 correlation with histologic inflammation in the discovery cohort, as defined by the Nancy score  
203 <sup>18</sup> (Figure 1A). Using an additional clinical cohort of Oxford UC patients (Supplementary Table  
204 6), we confirmed that the Nancy score is higher in non-responders to anti-TNF therapy before  
205 the start of treatment (Figure 2A). Interestingly, this was not true for the UCEIS (an endoscopic  
206 score of mucosal inflammation) or other clinical or endoscopic measures (Extended Data  
207 Figure 2A).

208 On this basis we postulated that the gene co-expression patterns in the dataset, which we  
209 previously linked to changes in cellular composition, might also reflect the manifestation of  
210 histopathologic features in patient tissues. To explore this, we quantified established  
211 histopathologic features of IBD on H&E sections of resected patient tissue (Extended Data  
212 Figure 2B). First, we examined the correlation of histopathologic features with each other  
213 (Extended Data Figure 2C). The only strong positive correlations observed were between  
214 cryptitis/crypt abscess and architectural distortion/ goblet cell depletion; as well as several  
215 associations with granulomas, although the latter estimates were based on very few cases  
216 where both granulomas and the other features were observed. We then looked for correlations  
217 between the expression of the co-expression modules and histologic features scored from



218 tissue where both were available (n=36). Several nominally significant associations were  
219 observed between modules and various features (Figure 2B); however, only positive  
220 correlations between M4/ulceration and M6/lymphoid aggregates remained significant after  
221 adjusting for multiple testing ( $P$  adjusted  $< 0.05$ , Figure 5A). Notably, the relation of these two  
222 inflammation-associated modules was almost orthogonal, each correlating only with one of  
223 the features (Figure 2C). Despite not reaching significance after correction, M5 – also highly  
224 correlated with the Nancy score (Figure 1A) – correlated strongly with both ulceration and  
225 cryptitis/crypt abscesses (Figure 2C). We also confirmed the associations of M4, M5 with  
226 ulceration in an independent paediatric cohort (n=172) containing inflamed tissues of both UC  
227 and CD patients {Haberman, 2014 #722; Loberman-Nachum, 2019 #1093} (Extended Data  
228 Figure 2D). In this dataset, 11% of all patients with IBD showed high M4/M5 tissue expression  
229 (Extended Data Figure 2E). Similar to our dataset, M6 expression was not significantly  
230 different by ulceration status in the paediatric cohort, although we noted that overall M6  
231 expression was also much lower in these biopsy samples (see discussion).

232 The almost orthogonal relation of M4/M5/ulceration with M6/lymphoid aggregates suggested  
233 these may represent distinct underlying inflammatory processes that may be more or less  
234 dominant in a given patient's tissue. To investigate this, we grouped patients by unsupervised  
235 clustering on module M4/M5/M6 expression to determine the relative proportion of samples  
236 belonging to these groups. This yielded four groups: M4/M5 high expression (21.7% of  
237 patients), M6 high expression, M5 only high expression and M4/M5/M6 low (each 26.1% of  
238 patients) (Figure 2D). We then plotted the expression of cytokines and therapeutic targets  
239 reliably detected in our discovery cohort across these groups (Figure 2E). The M4/M5 high  
240 group displayed significantly increased expression of *IL1B* compared to the rest of the patients  
241 (Figure 2E, red). However, neither *ITGA4/ITGB7* (targeted by anti-integrin), *N3RC1* (targeted  
242 by corticosteroids) nor *TNF* (targeted by anti-TNF) were increased in the tissue of these  
243 patients (Figure 2E). By contrast, high expression of module M6 was linked to increased levels  
244 of *ITGA4* and *N3RC1*, as well as *CCL19*, *CCL21* and *CXCL13* but not *TNF* (Figure 2E, blue).

245 Patients high in M5 expression only did not demonstrate significant changes in  
246 cytokine/therapeutic target signatures (Figure 2E, orange). These results suggest that patient  
247 responses to specific treatments might be determined by which inflammatory pathology  
248 predominates at the tissue level. M4/M5-high tissues did not show any increase in current  
249 therapeutic targets and these modules were associated with non-response to all therapies  
250 tested; whereas M6-high tissues only showed no increase of *TNF* expression in the tissue,  
251 which corroborated our previous association analyses where it was only associated with non-  
252 response to anti-TNF (Supplementary Table 4).

253 The quantification of histological features confirmed that an increased expression of both M4  
254 and M5 is linked to the presence of deep ulcerations and M5 to cryptitis/crypt abscesses.  
255 Whereas other inflammatory features were instead correlated with alternative co-expression  
256 patterns, as in the case of lymphoid aggregates and the M6 module. Patients with ulceration  
257 and high M4/M5 expression showed no significant up-regulation of genes targeted by the  
258 current medications, but an increase in *IL1B*, warranting further exploration of the mechanisms  
259 underlying this signature.

260 **High expression of modules M4 and M5 reflects neutrophil infiltrates, activated**  
261 **fibroblasts and epithelial cell loss**

262 We performed a more detailed exploration of the changes in cellular composition and  
263 activation state that produce the M4 and M5 co-expression module signature. Our *in silico* cell  
264 type deconvolution revealed that M4 and M5 were predominantly associated with stromal  
265 cells, such as fibroblasts, and granulocytes, such as neutrophils (Extended Data Figure 1B).  
266 We confirmed this by projecting modules M4 and M5 onto single-cell transcriptomic datasets  
267 derived from inflamed and non-inflamed CD {Martin, 2019 #567} and UC patient tissue<sup>12</sup>. This  
268 showed that the module M4 likely reflected the presence of “activated/inflammatory  
269 fibroblasts”, whereas module M5 reflected “myeloid cells/inflammatory monocytes” (Figures  
270 3A and 3B).

271 Given that cell type deconvolution correlated neutrophil scores with M5, but the single-cell  
272 datasets (which did not capture neutrophils) correlated monocytes/macrophages with M5  
273 genes, we aimed to identify genes within M4 and M5 enriched in either of these cell types, as  
274 well as in stromal cells. We FACS-sorted well-defined hematopoietic and non-hematopoietic  
275 cell subsets from the intestinal tissue of non-IBD and IBD patients and measured the  
276 expression of selected M4/M5 genes by qPCR (see Extended Data Figure 3A for gating  
277 strategy). Several M4/M5 genes were highly expressed in CD16<sup>hi</sup> neutrophils and  
278 PDPN+THY1+ stromal cells (Extended Data Figure 3B). This was confirmed by targeted  
279 RNAseq from neutrophils, stromal cells and mononuclear phagocytes (MNP) (see Extended  
280 Data Figure 3C for gating strategy), which were bulk-sorted from inflamed endoscopic biopsies  
281 of n=13 IBD patients (UC and CD, Figure 3C, see Supplementary Table 7 for patient cohort  
282 details). We first carried out pathway analysis to assign function to all the genes (including  
283 those not in M4 and M5) enriched in either cell type (see Supplementary Table 8 for differential  
284 gene expression analysis). As expected, this demonstrated that neutrophils were enriched in  
285 anti-microbial and tissue-toxic granule biology when compared to MNPs that were mostly  
286 defined by genes belonging to the antigen presentation pathway (Extended Data Figure 3D).  
287 Stromal cells were enriched in many genes assigned to extracellular matrix pathways  
288 (Extended Data Figure 3D). Of all differentially expressed genes between the cell types, n=39,  
289 n=31 and n=4 of all genes contained in M4/M5 (n=110) were significantly enriched in stromal  
290 cells, neutrophils and MNPs, respectively (Supplementary Table 8, Figure 3C). Compared to  
291 both neutrophils and MNPs, sorted stromal cells were enriched in transcripts for components  
292 (*COL7A1*) and remodelling enzymes (*MMP1/3*, *ADAMTS7/14*) of the extracellular matrix  
293 (ECM), markers of activated fibroblasts (*THY1*, *PDPN*, *FAP*), as well as for ligands of the  
294 chemokine receptors CXCR1/CXCR2 identified as enriched in neutrophils (*CXCL5/6*). Genes  
295 encoding major neutrophil chemokine receptors (*CXCR1/2*), subunits of the antimicrobial  
296 peptide calprotectin (*S100A8/A9*), receptors for IgG immunoglobulin constant regions  
297 (*FCGR3B*) and the cytokine *OSM*, which we previously linked to non-response in IBD<sup>10</sup>, were  
298 enriched in neutrophils. Amongst the four genes enriched in MNPs, *CD300E* is a marker of

299 activated monocytes<sup>22</sup>, whereas *LAMP3* has been described as indicative of mature dendritic  
300 cells<sup>23</sup>. The enrichment of many M4 and M5 genes in sorted neutrophils explained the high  
301 correlation of modules M4 and M5 with the Nancy index (Figure 1A), which is weighted by the  
302 abundance of neutrophils for scoring<sup>18</sup>.

303 Since differences in whole tissue gene expression signatures could be driven by both changes  
304 in the transcriptional profiles within cell-types and/or overall changes in cell-type composition,  
305 we used flow cytometry to test whether the number of neutrophils and fibroblasts correlated  
306 with M4 and M5 tissue expression (see Extended Data Figures 3E for classification of tissues  
307 by M4/M5 expression). The percentage of neutrophils was significantly increased (up to 10  
308 fold) in M4/M5 high tissues while the percentage of stromal cells remained unchanged (Figure  
309 3D). Additionally, epithelial cells were significantly decreased in M4/M5 high tissues (Figure  
310 3D). We also observed non-significant trends for an increase of MNP and endothelial cells, as  
311 well as a trend for decreased eosinophils with high M4/M5 expression (Figure 3D). Whilst  
312 these trends may become significant with an increased number of samples, we noted that  
313 neutrophils accounted for up to 38% of the total live cells in the M4/M5 intermediate and high  
314 group, whilst the percentage of MNPs was much lower (<5%) (Figure 3D). Additionally, we  
315 found that the M4/M5 genes significantly enriched in neutrophils and stromal cells, but not  
316 MNPs, demonstrated highest predictive power for non-response to anti-TNF and  
317 corticosteroids (Figure 3E).

318 FACS counts can be biased by tissue digestion methods, so we also quantified the presence  
319 of neutrophils, stromal cells and MNPs *in situ* by immunohistochemical staining of resected  
320 formalin-fixed, paraffin-embedded (FFPE) inflamed tissue from IBD patients (Figure 3F).  
321 Again, IBD tissues with high expression of M4 and M5 in whole tissue (see Extended Data  
322 Figure 3F for classification) demonstrated a higher percentage of Neutrophil Elastase- (NE)  
323 and Calprotectin- (S100A8/A9) positive cells, but not PDPN-positive stromal cells or CD68+  
324 MNPs, in inflamed tissues (Figure 3G). This further confirmed that M4/M5 high tissue harbours  
325 an increased number of neutrophils which stain positive for NE and S100A8/A9.

326 High M4/M5 expression in the whole tissue thus reflects ulceration characterised by a  
327 dominance of neutrophil infiltration, expression of genes characteristic of activated fibroblasts,  
328 and the loss of epithelial cells.

329 **M4/M5 gene expression is associated with neutrophil-attracting fibroblasts and**  
330 **endothelial and perivascular cell expansion**

331 M4/M5 high patients are characterised by a high abundance of neutrophils but the modules  
332 also contain many genes indicative of activated stromal cells (Figure 3C). Furthermore, whilst  
333 the number of PDPN+ stromal cells was not increased, we observed an increased overall  
334 staining intensity of PDPN in M4/M5 high patients (Figure 3F). We therefore hypothesised that  
335 the stromal signatures in M4 and M5 arise from altered activation states (including the  
336 upregulation of PDPN) and/or changes of cellular composition within the stromal compartment  
337 that correlate with the infiltration of neutrophils. To dissect this relationship, we applied single-  
338 cell sequencing to EPCAM-CD45- intestinal stromal cells from endoscopic biopsies of  
339 inflamed UC patients (n=7) and healthy donors (n=4) (see supplementary Table 7 for patient  
340 cohort details), and compared tissues with low, intermediate and high M4/M5 expression  
341 (Figure 4A+B and Extended Data Figure 4A). As expected, tissues from all healthy donors  
342 were M4/M5 low, as well as the tissue from one IBD patient with a low histological inflammation  
343 score (Nancy score=1). We used Harmony to integrate all single-cell datasets and account for  
344 inter-patient and inter-sequencing batch effects<sup>24</sup>. Overall, 6 stromal clusters were obtained,  
345 which we assigned to endothelial cells (*ACKR1+CD34+*), pericytes (*NOTCH3+MCAM+*),  
346 myofibroblasts (*MYH11<sup>hi</sup>ACTG2+*) and three clusters of fibroblasts:  
347 *PDGFRA<sup>high</sup>PDPN<sup>low</sup>SOX6+* (“PDGFRA+”) fibroblasts, *PDGFRA<sup>low</sup>PDPN<sup>low</sup>ABCA8+*  
348 (“ABCA8+”) fibroblasts and *CD90<sup>hi</sup>PDPN<sup>hi</sup>PDGFRA+ABCA8+FAP+* “inflammatory”  
349 fibroblasts, based on the top differentially expressed markers and previously described  
350 annotations<sup>11,12,25</sup> (Figure 4C and Supplementary Table 9). *PDPN* was expressed by  
351 myofibroblasts and all three fibroblast clusters, with highest expression found in inflammatory

352 fibroblasts. *THY1* (CD90) was highly expressed in pericytes and inflammatory fibroblasts and  
353 expressed at lower levels in ABCA8+ fibroblasts (Figure 4C).

354 Next, we developed a panel of antibodies for *in situ* analysis of intestinal tissue to confirm that  
355 the clusters of stromal cells detected by transcriptomics represented spatially separated cell  
356 subsets. The panel comprised anti-THY1, anti-PDPN, anti-PDGFR $\alpha$  and anti-ABCA8 to  
357 localise the different subsets of fibroblasts (Figure 4D and Extended Data Figure 4B). Anti-  
358 THY1 and anti-MCAM were used to localise pericytes, and anti-PECAM1 (CD31) to localise  
359 endothelial cells (Figure 4E and Extended Data Figure 4C). In uninfamed large (colon) and  
360 small (ileum) intestinal tissue, high PDGFR $\alpha$  staining was observed in sub-epithelial  
361 fibroblasts, which also stained low for PDPN (Figure 4D and Extended Data Figure 4B). By  
362 contrast, ABCA8 stained a distinct fibroblast population residing in the intestinal lamina propria  
363 (Figure 4D and Extended Data Figure 4B). Highest PDPN staining was found on lymphatic  
364 endothelial cells (PECAM1+ and PDPN+, Figure 3E and Extended Data Figure 4C). By  
365 contrast, THY1 formed a gradient of staining intensity from the perivascular niche toward the  
366 lamina propria (as recently described in <sup>26</sup>), being expressed by both ABCA8+fibroblasts and  
367 MCAM+ pericytes, as well as cells in the muscular layer of the submucosa (Figures 3D,E and  
368 Extended Data Figure 4B, C).

369 We then characterised how the identified stromal compartments differed across IBD patient  
370 tissues with either low, intermediate or high M4/M5 expression. In the single-cell dataset, the  
371 percentage of inflammatory fibroblasts, pericytes and endothelial cells was increased in the  
372 M4/M5 intermediate and high patient groups at the expense of ABCA8+ and PDGFR $\alpha$ +  
373 fibroblasts (Figures 4A+B, Extended Data Figure 4D). FACS analysis verified that PECAM1+  
374 endothelial cell and PDPN+FAP+ inflammatory fibroblast frequencies were increased within  
375 the stromal compartment in inflamed tissue, compared to uninfamed adjacent tissue  
376 (Extended Data Figure 4E).

377 To see which of those clusters contributed most to M4/M5 expression, we projected the genes  
378 contained in the M4/M5 modules onto our scRNAseq data. Notably, the highest expression of

379 M4 was detected in the inflammatory fibroblast cluster, suggesting the emergence of this cell  
380 cluster as an underlying process in M4/M5 high IBD patient tissue (Figure 5A). Within M4/M5  
381 high tissues, neutrophil-targeting CXCR1/CXCR2 ligands CXCL1, CXCL2, CXCL3, CXCL5,  
382 CXCL6 and CXCL8 were significantly higher in inflammatory fibroblasts in comparison to other  
383 clusters (Figure 4B and Supplementary Table 10). We also identified several genes indicating  
384 extracellular matrix remodelling (MMP1, MMP3, MMP13) and previously identified markers  
385 associated with inflammatory fibroblasts (IL11, IL24, FAP) as higher in inflammatory  
386 fibroblasts compared to other stromal cells (Supplementary Table 10). Within the cluster of  
387 inflammatory fibroblasts, *PDPN*, *FAP*, *CXCL1*, *CXCL2*, *CXCL3*, *CXCL5*, *CXCL6* and *CXCL8*  
388 were also significantly increased in M4/M5 high compared to M4/M5 low and intermediate  
389 tissues, whereas *ABCA8* expression was downregulated (Supplementary Table 11).  
390 Nevertheless, *ABCA8* fibroblasts and *PDGFRA* fibroblasts both still expressed the above-  
391 mentioned chemokines in the M4/M5 intermediate and high groups (Figure 5B), raising the  
392 possibility that the inflammatory fibroblast cluster represents an activation state of *ABCA8*  
393 fibroblasts or/and *PDGFRA* fibroblasts. Indeed, trajectory (pseudotime) analysis indicated that  
394 inflammatory fibroblasts may represent a transcriptomic state in between *ABCA8*<sup>+</sup> and  
395 *PDGFRA*<sup>+</sup> fibroblasts (Extended Data Figure 4F) and could potentially arise from either  
396 population.

397 We confirmed these findings at the protein level, where we found that areas of increased  
398 *PDPN* and *THY1* staining were also characterised by a reduced staining of *ABCA8* and  
399 *PDGFRA* on fibroblasts (Extended Data Figure 4G). Similarly, we verified that an increased  
400 neutrophil presence is associated with more intense *PDPN* staining and the expansion of the  
401 vascular compartment (*THY1*, *CD31*), by staining for these markers in different IBD tissues  
402 with various grades of neutrophil infiltrates and epithelial damage (Figure 5C). In line with the  
403 neutrophil-attracting signature of inflammatory fibroblasts, tissues with dense neutrophil  
404 infiltrates (*NE*<sup>+</sup> cells) exhibited the highest level of *PDPN* on fibroblasts, particularly in areas  
405 of profound epithelial cell loss (i.e., ulceration) (Figure 5C). This was associated with the

406 expansion of THY1+ perivascular cells and blood endothelial vessels  
407 (PECAM1+THY1+PDPN-), while lymphatic endothelial cells (PDPN+PECAM1+) were mostly  
408 absent in areas of neutrophil presence and deep ulceration (Figure 5C). Furthermore,  
409 immunofluorescent localisation revealed that in particular PDPN+ fibroblasts that co-  
410 expressed FAP (magenta) are located in areas of NE+ neutrophil influx (Figure 5D).

411 Dissection of the changes within the stromal compartment revealed that the neutrophil  
412 infiltrates observed in M4/M5 high patients are associated with the activation of a neutrophil-  
413 chemoattractant program in PDPN+FAP+ inflammatory fibroblasts, as well as with  
414 angiogenesis and perivascular niche expansion.

#### 415 **Activated inflammatory fibroblasts drive neutrophil recruitment through IL-1R** 416 **signalling with high levels of IL-1 $\beta$ at sites of ulceration**

417 To identify potential novel therapeutics targets in the M4/M5 high non-responsive pathotype,  
418 we aimed to identify upstream cytokine signalling pathway(s) controlling the observed  
419 activation of the neutrophil-attractant program in inflammatory fibroblasts. We culture-  
420 expanded primary stromal cell lines (n=33) from surgically resected intestinal tissue of IBD  
421 patients and stimulated them with a panel of cytokines associated with IBD<sup>4</sup>. Of the cytokines  
422 assessed, only the NF- $\kappa$ B activators IL-1 $\beta$  and TNF- $\alpha$ , but not IL-6 or OSM, were capable of  
423 inducing the expression of CXCL5 in primary stromal cell lines after 3 hours of stimulation  
424 (Extended Data Figure 5A). Furthermore, RNA sequencing showed that IL-1 $\beta$  and TNF- $\alpha$   
425 strongly and significantly induced gene expression of all neutrophil-tropic CXCR1 and CXCR2  
426 ligands in fibroblasts, namely *CXCL1*, *CXCL2*, *CXCL3*, *CXCL5*, *CXCL6* and *CXCL8* (Extended  
427 Data Figure 5B). In addition, both cytokines induced the inflammatory fibroblast markers  
428 PDPN and FAP (Extended Data Figure 5B). Although TNF- $\alpha$  and IL-1 $\beta$  both induced a  
429 chemokine response, the latter was 100-fold more potent (Extended Data Figures 5B + C).

430 To confirm that the IL-1 signalling pathway is the functionally relevant one for inducing the  
431 inflammatory fibroblast phenotype in patients, we developed an *ex vivo* assay using surgically



432 resected tissue from IBD patients. Briefly, we produced conditioned media (CM) from single-  
433 cell suspensions of enzymatically digested intestinal tissue. When applied to cultured intestinal  
434 fibroblasts, this CM was capable of inducing a robust chemoattractant program (Figure 6A).  
435 To determine upstream cytokines driving this response, we blocked IL-1 signalling with the IL-  
436 1 receptor (IL-1R) antagonist anakinra (Kineret) or TNF signalling with the anti-TNF agent  
437 adalimumab (Humira) in CM. Strikingly, only IL-1R, but not TNF, signalling blockade was able  
438 to reduce fibroblast activation in this assay (Figure 6A). These findings demonstrated that  
439 soluble mediators contained in gut-resident cell populations of inflamed IBD tissue activate  
440 the neutrophil-attracting fibroblast program and that this response is IL-1R but not TNF-  
441 dependent. Furthermore, single-cell sequencing showed that inflammatory fibroblasts from  
442 M4/M5-high IBD patient tissue were the cell population which demonstrated the strongest IL-  
443 1 response pattern (Figure 6B, see Supplementary Table 12 for IL-1 gene expression  
444 response), suggesting that this pathway may be associated with the poor therapy response  
445 observed in these patients. In line with this, inflammatory fibroblasts and ABCA8 fibroblasts  
446 demonstrated the highest fold changes of IL-1-receptor (*IL1R1*) expression in M4/M5 high IBD  
447 patients (Extended Data Figure 5D). By contrast, TNF receptors (*TNFR1* and *TNFR2*) did not  
448 demonstrate this trend (Extended Data Figure 5D). Consistent with the predominant role of IL-  
449 1 in these patients, module M5 demonstrated a high enrichment of genes assigned to the  
450 inflammasome pathway (Extended Data Figure 5E). Finally, immunohistochemical staining  
451 revealed that IL-1 $\beta$  is localised specifically to the ulcer bed and granulation tissue (Figure 6C,  
452 top panel), but not uninfamed tissue or tissues where lymphoid aggregates dominate (Figure  
453 6D, top panel). Areas of intense IL-1 $\beta$  labelling also demonstrated intense staining of FAP  
454 (Figures 6C and D, bottom panels), suggesting that IL-1R signalling in the ulcer bed is driving  
455 the inflammatory fibroblast program characterised by FAP expression.

456 Overall, these results identify IL-1R signalling as a key driver of the inflammatory  
457 fibroblast/neutrophil recruitment phenotype that is observed in IBD tissues with the high

458 M4/M5 pathotype, which is in turn associated with non-response to multiple therapies currently  
459 in use.

## 460 **Discussion**

461 Here we integrated transcriptomics, cellular profiling, histopathology and functional assays to  
462 identify new, distinct, inflammatory pathotypes associated with therapy non-response in IBD.  
463 Non-response to multiple current therapies was associated with a pathotype defined by two  
464 gene expression modules that represented IL-1R-dependent inflammatory fibroblast  
465 activation, neutrophil accumulation and (peri-) vascular niche expansion at sites of epithelial  
466 depletion and deep ulceration. We also identified an additional pathotype associated with an  
467 increased presence of lymphoid aggregates that was only linked to patient response to anti-  
468 TNF. Combined, these results highlight the existence of distinct pathotypes within the  
469 heterogeneous cellular landscape of inflamed tissues in treatment-refractory IBD that are  
470 associated with specific treatment outcomes. This provides a novel platform for personalised,  
471 precision targeting of existing medications and novel therapeutic targets where current options  
472 fail.

473 Our results highlight neutrophils as a major component of the M4/M5 signature associated  
474 with multiple therapy non-response in IBD. In other studies, analysis of tissue-level expression  
475 signatures suggested a link between neutrophils and therapy non-response in IBD<sup>14,15</sup>. Here  
476 we have extended those studies by mapping gene expression signatures to intestinal  
477 neutrophils isolated from IBD lesions and localising those cells to distinct tissue niches in the  
478 inflamed intestine. It is also notable that a dominant neutrophil contribution to the biology of  
479 anti-TNF therapy resistance is missing from previous single cell sequencing studies as  
480 neutrophils were not analysed<sup>12,11</sup>. It is not known whether neutrophil accumulation is a cause  
481 or a consequence of the chronic tissue damage at sites of tissue ulceration. However, there  
482 is evidence that neutrophils can contribute to chronic inflammation through production of  
483 extracellular traps (NETs) and the liberation of reactive-oxygen species (ROS)<sup>27</sup>. We found

484 neutrophils are also the major source of *OSM* expression, a cytokine previously associated  
485 functionally with non-response to anti-TNF therapy in IBD <sup>10</sup>.

486 The accumulation of neutrophils, activation of fibroblasts and vascular remodelling in response  
487 to epithelial damage observed in treatment-refractory IBD lesions is reminiscent of wound  
488 healing mechanisms <sup>28</sup>. It is tempting to speculate that in a subset of non-responsive IBD  
489 patients such a chronic wound is a result of an unsuccessful attempt to rebuild the epithelial  
490 barrier. Without proper resolution, that process becomes pathogenic, analogous to the  
491 concept of a “wound that does not heal” that emerged from the cancer field <sup>29</sup>. Our single cell  
492 RNA sequencing analysis of the stromal compartment identified PDPN and FAP as two  
493 markers of fibroblast activation that allowed us to localise inflammatory fibroblasts around  
494 ulcers and in proximity to neutrophils. We hypothesise that, rather than being a specialised  
495 fibroblast subset, inflammatory fibroblasts may represent an activation state of either ABCA8  
496 fibroblasts residing in the lamina propria of the intestine, or subepithelial PDGFRA fibroblasts.  
497 The origin of inflammatory fibroblasts may dependent on the site where damage occurs, i.e.  
498 at the epithelial lining layer or deeper into the lamina propria. The very specific localisation of  
499 IL-1 $\beta$  in the ulcer bed in proximity to areas of epithelial cell damage suggests disruption of the  
500 epithelial cell barrier may be a primary event. Danger-associated molecular patterns (DAMPs)  
501 released by necrotic epithelial cells could also lead to the activation of inflammasome  
502 pathways and consequently the release of IL-1 $\beta$ . Indeed, several genes associated with an  
503 inflammasome signature were found in module M5 of our discovery cohort supporting the idea  
504 that inflammasome activation is an upstream event. Early responders to damage at the barrier  
505 may also include resident MNP, that can produce excessive IL-1 $\beta$  and IL-23, particularly in  
506 the context of IL-10 pathway deficiency <sup>16</sup>. IL-1R-mediated fibroblast activation leads to the  
507 expression of neutrophil-attracting chemokines amongst other inflammatory mediators.  
508 Neutrophils are then recruited in high numbers to the site of damage, further contributing to  
509 the production of IL-1 $\beta$  in the ulcer bed. The alarmin IL-1 $\alpha$  may similarly contribute to the  
510 activation of fibroblasts and initiation of colitis <sup>30 31</sup>, and can be released by necrotic epithelial

511 cells in IBD <sup>32</sup>. Further studies are required to establish if the IL-1R-driven activation of  
512 inflammatory fibroblasts identified here is dominated by IL-1 $\alpha$  or IL-1 $\beta$  signalling or both. We  
513 did not find IL-18 to be increased in the tissue of M4/M5-high patients.

514 Currently, sub-categories of IBD are classified by high level phenotypic observations. A lack  
515 of knowledge about the molecular pathotypes in IBD means that therapies are currently not  
516 prescribed based on the underlying biologic processes they target and therefore often fail. A  
517 number of recent studies have tried to address the challenge of therapy non-response by  
518 analysing the cellular and molecular network in treatment-refractory IBD. Whilst several genes  
519 found in our M4/M5 modules have been previously associated with non-response to anti-TNF  
520 therapy or corticosteroids <sup>10-12,14-17,20</sup>, none of those studies addressed the heterogeneity of  
521 molecular inflammatory phenotypes in IBD. By relating molecular signatures (modules) to  
522 histologic features, we were able establish this link and identified at least two distinct  
523 pathotypes with important implications for patient stratification for therapeutic targeting. In  
524 addition to patients with high tissue expression of M4/M5 and substantial ulceration (22/11%  
525 of patients in the discovery/early-onset cohorts), we also identified patients with high M6 tissue  
526 expression (26% of patients in the discovery cohort) that is associated with increased lymphoid  
527 aggregates; the high tissue expression of *CCL19/CCL21/CXCL13* also suggests that this  
528 pathotype reflects the presence of fibroblastic reticular-like cells <sup>25</sup>, as opposed to the  
529 inflammatory fibroblast phenotype detected in M4/M5 high tissues. The expression of M6 was  
530 very low in the early-onset cohort of paediatric UC and CD. This may reflect the different nature  
531 of the samples analysed in the two studies. The latter used endoscopic punch biopsies  
532 (mucosa), as opposed to full thickness (mucosa/muscularis/submucosa) samples from  
533 surgical specimens in our discovery cohort. Although present in the mucosa, lymphoid  
534 aggregates are more prominent in submucosal regions. This requires consideration when  
535 interpreting lymphoid tissue signals from endoscopic biopsies of the gut. Tissues high in M6  
536 showed elevated expression *NR3C1* and *ITGA4*, but not *TNF*. This is consistent with our  
537 findings that M6 is predictive of non-response to anti-TNF, but not of non-response to

538 corticosteroid or anti-integrin, suggesting that such M6 high patients may benefit from  
539 vedolizumab or corticosteroids.

540 By contrast patients with UC or CD whose tissues show a high M4/M5 signature and ulceration  
541 express high amounts of *IL1B* but not *NR3C1*, *ITGA4* or *TNF* suggesting that subgroup may  
542 benefit from blocking IL-1R instead of TNF, to target the neutrophil-attractant program in  
543 fibroblasts. Indeed, TNF has been shown to promote mucosal healing <sup>33</sup> and therefore may  
544 be deleterious in patients with deep ulceration that require wound healing. Genetic defects in  
545 the IL-1 pathway have been linked to anti-TNF non-response <sup>34</sup> and the principle of  
546 ameliorating acute intestinal inflammation by blockade of IL-1 signalling has been  
547 demonstrated in several pre-clinical models <sup>35-37</sup>. In case studies of Mendelian disease-like  
548 IBD (MD-IBD) with IL-10 deficiency, the blockade of IL-1 signalling has been successfully  
549 applied to treat intestinal inflammation <sup>38,39</sup>, providing proof of concept. Surprisingly, larger  
550 scale studies of IL-1 blockade in polygenic IBD patient cohorts are lacking, although trials in  
551 acute severe ulcerative colitis are in progress <sup>40</sup>. Future trials may benefit from stratifying  
552 participants for inclusion based on the observations presented here. By dissecting IBD patient  
553 heterogeneity at a cellular and molecular level, we provide a rationale for targeting  
554 therapeutics to the underlying pathologies, based on histologic features and molecular  
555 signatures rather than high-level phenotypic diagnoses.

556 Our discovery cohort of surgical resection samples from patients with UC or CD highlights the  
557 heterogeneity of inflammatory lesions in this difficult-to-treat patient group. This data is just a  
558 snap-shot and does not inform on the evolution and dynamics of these distinct pathotypes.  
559 However, the presence of M4/M5 signature high patients before treatment in a number of  
560 prospective cohorts suggests that deep ulceration and high M4/M5 signature can occur  
561 independently of therapy failure. Our study does not address whether lymphoid aggregates  
562 and ulceration are independent processes or connected states. Notably, the presence of  
563 M4/M5 and M6 is not mutually exclusive, and a small number of tissues exhibited both  
564 ulceration and lymphoid aggregates. Further understanding of the natural history of these

565 distinct pathotypes and their relationship to disease dynamics will require longitudinal  
566 analyses.

567 In summary, our combinatorial approach, integrating data across biological levels, identifies  
568 new tissular IBD pathotypes that are defined by different molecular, cellular and  
569 histopathologic features that are linked to patient responses to current therapeutics. These  
570 stratifications provide a basis for personalised targeting of existing medicines and indicate that  
571 IL-1 signalling blockade may benefit those individuals with deep ulceration who do not respond  
572 to current therapeutics. This may improve treatment trajectories for patients with IBD, both by  
573 hastening administration of appropriate interventions and providing a novel mechanism to  
574 target in an area of current unmet clinical need.

#### 575 **Acknowledgements**

576 M.F. has been supported by the Roche postdoctoral fellowship program (2016-2017) and is  
577 currently supported by the Oxford-UCB-prize fellowship scheme. M.P. has been supported by  
578 the Roche postdoctoral fellowship program (2017-2019). M.A.J. is funded by the Kennedy  
579 Trust for Rheumatology Research and supported by a Junior Research Fellowship from  
580 Linacre College Oxford. The authors thank members of the Oxford TGU biobank, especially  
581 James Chivenga, Adam Isherwood and Roxanne Williams, as well Gkentiana Zavalani for  
582 facilitating access to patient samples. This work was supported by the National Institute for  
583 Health Research (NIHR) Oxford Biomedical Research Centre (BRC). The views expressed  
584 are those of the author(s) and not necessarily those of the NHS, the NIHR, or the Department  
585 of Health. Parts of this work were supported by the BRC3 mucosal immunology response  
586 mode funding and the Wellcome Trust (212240/Z/18/Z). The authors further thank Johanna  
587 Pott for helping to set up *ex vivo* functional assays and the following Kennedy Institute core  
588 facility members for excellent technical support and training: Jonathan Webber, Bryony Stott,  
589 Ida Parisi, Claudia dos Santos Duarte and Volodymyr Nechyporuk-Zloy.

#### 590 **Author contributions**

591 Conceptualisation, M.F., M.P., M.A.J and F.M.P. Methodology, M.F., M.P., M.A.J., I.K., S.B.,  
592 K.R., D.S., M.A., K.W., G.W., Roche Fibroblast Network Consortium, A.E., S.S., S.R., S.P.T.  
593 and F.M.P. Software, M.A.J. and I.K. Validation, M.F., M.P., M.A.J. and I.K. Formal Analysis,  
594 M.F., M.P., M.A.J., I.K., K.R., E.C. and A.E. Investigation, M.F., M.P., S.B., D.S., H.S, R.R.  
595 and A.G. Resources, M.F., M.P., Z.C., R.R., R.S.P., E.H.M., A.G., T.T., Oxford IBD Cohort  
596 Investigators, Roche Fibroblast Network Consortium, S.M., L.T., S.S., S.R., S.P.T. and F.M.P.  
597 Data Curation, M.F., M.P., M.A.J., I.K., S.B., K.R., Z.C., D.S., R.R., L.T. and A.E. Writing –  
598 Original Draft: M.F., M.P., M.A.J., and F.M.P. Writing – Review & Editing: all authors listed.  
599 Visualisation, M.F., M.P., M.A.J., I.K., and K.R. Supervision, M.F., M.P., S.B., S.S., S.R.,  
600 S.P.T. and F.M.P. Project Administration, M.F., M.P., TGU Biobank Consortium, S.P.T. and  
601 F.M.P. Funding Acquisition, M.F., I.K., S.B., Z.C., S.R., S.P.T. and F.M.P.

## 602 **Competing Interests Statement**

603 *Fiona Powrie, PhD, FRS, FMedSci*

604 Grants/Research support: Roche and Janssen

605 Consulting fees: GSK and Genentech

606

607 *Simon Travis, DPhil FRCP*

608 Grants/Research Support: AbbVie, Buhmann, Celgene, IOIBD, Janssen, Lilly, Pfizer, Takeda,  
609 UCB, Vifor and Norman Collisson Foundation.

610 Consulting Fees: AbbVie, Allergan, Abiomics, Amgen, Arena, Asahi, Astellas, Biocare,  
611 Biogen, Boehringer Ingelheim, Bristol-Myers Squibb, Buhmann, Celgene, Chemocentryx,  
612 Cosmo, Enterome, Ferring, Giuliani SpA, GSK, Genentech, Immunocore,  
613 Immunometabolism, Indigo, Janssen, Lexicon, Lilly, Merck, MSD, Neovacs, Novartis,  
614 NovoNordisk, NPS Pharmaceuticals, Pfizer, Proximagen, Receptos, Roche, Sensyne, Shire,  
615 Sigmoid Pharma, SynDermix, Takeda, Theravance, Tillotts, Topivert, UCB, VHsquared, Vifor,  
616 Zeria.

617 Speaker fees: AbbVie, Amgen, Biogen, Ferring, Janssen, Pfizer, Shire, Takeda, UCB.

618 No stocks or share options.

619

620 *K.G.L. and A.P.F.* are employees of Roche Ltd. All authors declare no commercial or financial  
621 conflict of interest.

622 **Figure 1. Identification of gene co-expression signatures of inflammation associated**  
623 **with patient non-response to multiple different IBD therapies** A) Pearson correlation  
624 between module eigengenes and clinical and histologic metadata in inflamed and CRC  
625 derived tissues within the discovery cohort; all modules/features with at least one significant  
626 association shown, bordered squares indicate significant correlations (FDR  $p < 0.05$ ). B-D)  
627 Module M4 and M5 expression (eigengene value) in non-responders and responders before  
628 the start of corticosteroid (B<sup>15</sup>), anti-TNF (C+D<sup>20,21</sup>) or monthly anti-integrin therapy (D<sup>21</sup>)  
629 (Mann-Whitney U, FDR adjusted P-values, post-hoc to ANOVA comparisons across the  
630 various treatment regimens in the Arjis 2018 study in the case of D). E) Performance (AUROC)  
631 of individual genes for predicting non-response to corticosteroid (y-axis) and anti-TNF (x-axis)  
632 therapy; genes contained in M4 and M5 are labelled and highlighted by turquoise and orange  
633 datapoints respectively. F) Violin plots showing the rank of genes based on their predictive  
634 power (area-under-the-receiver-operator-curve, AUROC) for response to both anti-TNF and  
635 corticosteroid therapy, comparing all modules as detected in the WGCNA analysis. Combined  
636 ranks represent the sum of each gene's ranks in the separate corticosteroid and anti-TNF  
637 analyses (their ranks on the x and y axes in (E)).

638 **Figure 2. Co-expression modules linked with therapy non-response represent distinct**  
639 **histopathologic features**

640 A) Nancy histologic scores in non-responders to anti-TNF therapy before the start of treatment  
641 (horizontal bars indicate geometric mean, Mann-Whitney U test P values given). B) Heatmap  
642 of correlations between module eigengene expression and histological features quantified  
643 across tissues from IBD patients in the discovery cohort. Nominally significant associations  
644 ( $p < 0.05$ ) are indicated by borders and FDR significant (FDR  $p < 0.05$ ) associations are



645 indicated by dots. C) Scatter plots showing eigengene expression of M4, M5 and M6 versus  
646 selected quantified histologic features in tissue samples from IBD patients of the discovery  
647 cohort. D) Classification of M4/M5 high, M5 only high, M6 high and M4/M5/M6 low patients in  
648 the discovery cohort, based on hierarchical clustering of module eigengene values from  
649 inflamed tissue samples. E) Normalised expression (tpm) of cytokine and therapeutic target  
650 genes that were reliably (in >50% of samples) detected in the discovery cohort. The  
651 expression of these genes is compared in the M4/M5 high (red), M5 only high (orange), M6  
652 high (blue) or M4/M5/M6 low tissues (bottom panel). Horizontal lines indicate the median and  
653 p-values (Wilcoxon signed rank test, adjusted for multiple testing) for each comparison are  
654 given if significant ( $P < 0.05$ ).

655 **Figure 3. High expression of modules M4 and M5 reflects neutrophil infiltrates,**  
656 **activated fibroblasts and epithelial cell loss.**

657 A+B) Module M4 and M5 expression in cell clusters detected by scRNAseq in UC<sup>12</sup> and CD  
658<sup>11</sup> patient tissue. C) Heatmap of the expression (TPM values, z-score, Manhattan distance  
659 clustering) levels of all genes contained within M4 and M5 in THY1+PDPN+ stromal cells,  
660 CD16<sup>hi</sup> neutrophils, and CD14+HLA-DR+/- MNPs, FACS-sorted from inflamed IBD patient  
661 tissue. The genes are ordered by their log fold-change of significant enrichment ( $P$  adjusted <  
662 0.05) in either cell type. D) FACS cell type percentages in tissue isolates from IBD patients,  
663 classified into low (white), intermediate (orange) or high (red) expression of M4/M5 (see  
664 Extended Data Figure 3E). Pie-charts show medians across samples and boxplots individual  
665 samples. (\* in pie charts indicates cell population percentages significantly different between  
666 groups, post-hoc 2-way ANOVA adjusted  $P$ -values are given, if significant). E) Violin plots  
667 showing the rank of genes based on their predictive power (AUROC) for response to both anti-  
668 TNF and corticosteroid therapy, comparing genes significantly enriched in neutrophils, stromal  
669 cells, MNPs or neither. Combined ranks represent the sum of each genes ranks in the  
670 separate corticosteroid and anti-TNF analyses. F) Illustrative IHC staining (DAB, counterstain  
671 hematoxylin) of Podoplanin (PDPN), neutrophil-elastase (NE), calprotectin (S100A8/A9) or

672 CD68 in serial sections of IBD patient tissue classified as low, intermediate or high for M4/M5  
673 whole tissue gene expression (see Extended Data Figure 3F). G) Automated quantification  
674 (% positively stained cells of total cells detected in inflamed areas) of IHC stainings as shown  
675 in F); each staining was performed on inflamed tissue sections with low (n=17), intermediate  
676 (n=13) and high (n=12) M4/M5 whole tissue gene expression (see Extended Data Figure 3F);  
677 post-hoc 2-way ANOVA adjusted P-values are given, where significant.

678 **Figure 4. Stromal architecture of the large and small intestine in health and disease.**

679 A) UMAP of stromal clusters identified by Harmony in stromal compartments FACS-sorted  
680 from healthy donor and IBD patient tissue with low, intermediate and high M4/M5 whole tissue  
681 gene expression (see Extended Data Figure 4A). B) Proportion (% of total stromal cells) of the  
682 cell type clusters in A in the M4/M5 low, intermediate and high tissue. C) Heatmap of selected  
683 markers of each of the cellular cluster as in A, as identified by Harmony; Expression values  
684 are normalised log<sub>2</sub> fold changes (Wald statistic  $\frac{\beta_g}{\sigma_g}$ ) from DESeq2 analyses. D)  
685 Immunofluorescent staining of THY1 (Blue), Podoplanin (PDPN, Green), ABCA8 (red) and  
686 PDGFRA (yellow) to visualise the localisation of fibroblast subsets in resected tissue from IBD  
687 patients (uninflamed areas). E) Immunofluorescent staining of THY1 (Blue), Podoplanin  
688 (PDPN, Green), PECAM1 (Red) and MCAM (orange) to visualise the localisation of vascular  
689 (endothelial) and perivascular cells (uninflamed areas). PDGFRA: PDGFRA+ fibroblasts,  
690 ABCA8+ : ABCA8+ Fibroblasts, BEC, blood endothelial cells, LEC : lymphatic endothelial  
691 cells.

692 **Figure 5. M4/M5 gene expression is associated with neutrophil-attracting fibroblasts**

693 **and endothelial and perivascular cell expansion.** A) UMAP of stromal single-cell  
694 profiles showing the different stromal clusters as in Figure 4A for comparison (top panel), and  
695 the expression level of M4 (middle panel) / M5 (bottom panel) genes in these clusters (as in  
696 Figure 3A). B) Heatmap showing normalised gene expression of the top differentially  
697 expressed genes between M4/M5 expression levels within each cell cluster. Expression

698 values are normalised log2 fold changes (Wald statistic  $\frac{\beta_g}{\sigma_g}$ ) from DESeq2 analyses (see STAR  
699 Methods). C) Staining of NE or PECAM1 (red), THY1 (blue) and PDPN (green) in IBD patient  
700 tissues with varying grades of neutrophil infiltration. D) Staining of NE (green), FAP (blue) and  
701 PDPN (red) in paired inflamed (deep ulcer) and uninfamed IBD tissue.

702 **Figure 6. Activated inflammatory fibroblasts drive neutrophil recruitment through IL-1R**  
703 **signalling with high levels of IL-1 $\beta$  at sites of ulceration.** A) Ccd18-co fibroblasts were  
704 stimulated for 3 h with either mock control or conditioned media produced from IBD patient  
705 tissue digests (CM), without pre-treatment (vehicle = PBS), or pre-incubated with IL-1Ra  
706 (anakinra) or anti-TNF (adalimumab). Adjusted P-values are shown if significant ( $p < 0.05$ ),  
707 Friedman test for paired samples. B) Projection of the IL-1 cytokine stimulation response of  
708 Ccd18-co fibroblasts onto stromal cell clusters detected by scRNAseq (see Figure 3A). Score  
709 was computed as mean z-score of IL-1 upregulated genes. C) IHC stainings of IL-1 $\beta$  or FAP  
710 (DAB, counterstain hematoxylin) in inflamed tissue sections of IBD patients with prominent  
711 ulceration and/or granulation tissue. \* indicates non-specific staining of erythrocytes or  
712 platelets in vessels. D) Stainings as in C), but in inflamed sections of IBD patients with  
713 dominant lymphoid aggregates.

## 714 **Online Methods**

### 715 ***Patient cohorts and ethics***

716 Patients eligible for inclusion in the discovery cohort were identified by screening surgical  
717 programs at Oxford University Hospitals. Samples were obtained from patients undergoing  
718 surgical resection of affected tissue for ulcerative colitis (UC), Crohn's disease (CD) or  
719 colorectal cancer (CRC) (used as non-IBD controls). All tissue samples included in the study  
720 were classified by pathological examination as either macroscopically active inflamed or  
721 uninfamed. Additional samples were also obtained from CD and UC patients or from healthy  
722 individuals by biopsy. All patients gave informed consent and collection was approved by NHS  
723 National Research Ethics Service under the research ethics committee references IBD

724 09/H1204/30 and 11/YH/0020 for IBD or GI 16/YH/0247 for CRC samples and gut biopsies  
725 from healthy individuals. Samples were immediately placed on ice (RPMI1640 medium) and  
726 processed within 3 hours. All patients gave informed consent and data was fully anonymised  
727 prior to analyses. For replication of prospective findings in the discovery cohort, public  
728 datasets were used that were derived from endoscopic tissue samples of IBD patients<sup>15,20,21,41</sup>  
729 (GSE16879, GSE73661, GSE109142, GSE57945).

### 730 **Isolation of cells from tissue and blood samples**

731 After removing external muscle and adipose layers, and removing bulk epithelial cells by  
732 repeated washes in PBS containing antibiotics (Penicillin-streptomycin, amphotericin B,  
733 gentamicin, ciprofloxacin) and 5mM Ethylenediaminetetraacetic acid (EDTA, Sigma Aldrich),  
734 tissue from surgical resections was minced using surgical scissors. In the case of endoscopic  
735 biopsies, the epithelial wash was omitted. Minced tissue was subjected to multiple rounds of  
736 digestion in RPMI1640 medium containing 5% fetal bovine serum (FBS), 5mM HEPES,  
737 antibiotics as above, and 1mg/ml Collagenase A and DNase I (all from Sigma Aldrich). After  
738 30 minutes, digestion supernatant containing cells was taken off, filtered through a cell  
739 strainer, spun down and resuspended in 10ml of PBS containing 5% BSA and 5mM EDTA.  
740 Remaining tissue was then topped up with fresh digestion medium until no more cells were  
741 liberated from the tissue.

### 742 **Primary culture expansion and conditioned media production**

743 Primary stromal cell lines were expanded by plating the single-cell suspension of tissue  
744 digests onto plastic cell culture vessels and expanding the adherent fraction (>95% CD45-  
745 EPCAM-CD31- cells, not shown) in RPMI1640 (with 20%FCS, antibiotics, 5mM HEPES)  
746 (Sigma). Primary cell lines were used for assays between passage number 7 and 15. For the  
747 production of conditioned media, sorted cell populations were plated at 1.000.000 cells/ml in  
748 cell culture dishes and RPMI1640 containing 5%FCS (LifeTechnologies), antibiotics, and 5mM

749 HEPES for 16 hours. After that, supernatants were aspirated, spun down to remove cells, and  
750 frozen at -80°C until further use.

### 751 **Fluorescence-activated cell sorting (FACS) and analysis**

752 Single-cell suspensions obtained from tissue digests were stained for FACS analysis or sorting  
753 with antibodies (all from Biolegend, except anti-Pdpn: clone NZ-1.3 from eBioscience) in PBS  
754 with 5% BSA and 5mM EDTA for 20 minutes on ice. After washing in the same buffer, cells  
755 were analysed (LSRII or Fortessa X20) or sorted (Aria III, 100um nozzle).

### 756 ***Ex vivo* assay of IBD patient conditioned media transferred onto fibroblasts**

757 For the stimulation of stromal cells, either Ccd18-Co colonic fibroblasts (ATCC #CRL-1459)  
758 or primary stromal cell lines (isolated as above) were plated at 20000 cells/well in a 48-well  
759 plate. Plated cells were starved for 72 hours in culture medium without FCS, before stimulation  
760 with cytokines or conditioned media (pre-diluted 1:3 in starving medium) for 3 hours at 37°C.  
761 For blockade experiments, recombinant cytokines in starving medium or conditioned media  
762 were pre-incubated with 2mg/ml Anakinra (Kineret) or Adalimumab (Humira) for 1 hour at RT  
763 (shaking) before stimulation of cells. After 3 hours, supernatants were taken off and cells lysed  
764 directly in appropriate RNA lysis buffer.

### 765 **Isolation of RNA from tissue samples and cell populations**

766 Endoscopic punch biopsies or dissected tissue pieces from surgical resections were stored in  
767 RNAlater (Qiagen) upon collection until further processing. Tissue was homogenised using  
768 the soft tissue homogenizing CK14 kit (Pacelllys, Stretton Scientific 03961) in 300µl of RLT  
769 lysis buffer (Qiagen) and 20µM DTT (Sigma). RNA was isolated using the Qiagen Mini kit with  
770 a DNA digestion step (Qiagen). Bulk-sorted cell populations and cultured cells were directly  
771 lysed in RNA lysis buffer, followed by RNA isolation with the according kits and on-column  
772 DNase treatment.

### 773 **Sequencing of RNA from whole tissue and sorted cell populations**

774 Sequencing libraries were prepared using either the QuantSeq 3' mRNA-Seq FWD Library  
775 Prep Kit (Lexogen) for whole tissue samples or the Smart-seq2 protocol<sup>42</sup> for bulk and cultured  
776 cell populations (with our own in-house indexing primers). Libraries were sequenced using an  
777 Illumina HiSeq4000 with 75bp paired-end sequencing<sup>43</sup>. For qPCR analysis, 15 to 250ng of  
778 RNA was reverse-transcribed using the High-Capacity cDNA Reverse Transcription Kit  
779 (Applied Biosystems) and qPCR performed using Precision Fast qPCR mastermix with ROX  
780 at a lower level, 12.8mL (Primer design, Precision FAST-LR), and Taqman probes (Life  
781 Technologies).

782 Bulk RNA sequencing data were analysed using the bulk processing aspect of  
783 pipeline\_scrnaseq.py (<https://github.com/sansomlab/scseq>). Data quality was assessed using  
784 pipeline\_readqc.py (<https://github.com/cgat-developers/cgat-flow>). Sequenced reads were  
785 aligned to the human genome GRCh38 using Hisat2 (version 2.1.0)<sup>44</sup> using a reference index  
786 built from the GRCm38 release of the mouse genome and known splice sites extracted from  
787 Ensembl version 91 annotations (using the hisat2\_extract\_splice\_sites.py tool). A two-pass  
788 mapping strategy was used to discover novel splice sites (with the additional parameters: --  
789 dta and --score-min L,0.0,-0.2). Mapped reads were counted using featureCounts (Subread  
790 version 1.6.3; Ensembl version 91 annotations; with default parameters)<sup>45</sup>. Salmon v0.9.1  
791 was used to calculate TPM values<sup>46</sup> using a quasi-index (built with Ensembl version 91  
792 annotations and k=31) and gc bias correction (parameter "--gcBias"). For heatmap  
793 visualisations of gene expression levels, z-scores of TPM values and Manhattan distances  
794 were calculated within the *heatmap2* package in R. Differential expression analyses were  
795 performed using DESeq2 (v1.26.0)<sup>47</sup>. Raw data will be deposited in GEO.

796 Pathway enrichment analysis for groups of genes associated with cell types was carried out  
797 by the *enrichGO* function from the *clusterProfiler* package in R<sup>48</sup>. "Cellular component" GO  
798 annotation terms were used as pathways.

799 **Identification and quantification of gene co-expression modules in discovery data**

800 To reduce dimensionality within the dataset, an unbiased approach was used to collapse  
801 genes with similar expression patterns in the discovery RNAseq dataset. Normalised (TPM)  
802 counts were considered for all genes across all samples, including both inflamed and  
803 uninflamed tissues from the IBD patients and the samples from the CRC controls. These were  
804 filtered to remove genes with zero counts in over half of the samples and log transformed  
805 following the addition of a pseudo count. Transformed counts were then used to define  
806 modules of correlated genes using the weighted gene co-expression network analysis  
807 approach (WGCNA) in R <sup>49</sup>. In brief, this process calculates pair-wise Pearson correlation  
808 estimates between all genes. These are then raised to the power of a soft-threshold, in this  
809 case raising correlation coefficients to the power of 9, which magnifies the differences between  
810 large and small correlations. Finally, the network of these amplified correlations (where each  
811 gene is a node and each edge is a correlation) is used to generate a topological overlap matrix  
812 (TOM). This represents the similarity of expression patterns between a given pair of genes in  
813 the data set, similar to the correlation matrix, but taking into account their shared correlation  
814 with other genes. Finally, hierarchical clustering of the TOM is used to assign genes into  
815 modules based on their co-expression pattern. The *pickSoftThreshold* function was used to  
816 identify 9 as an appropriate soft-threshold. The *blockwiseModules* function was then used with  
817 this threshold to automatically carry out the aforementioned process and assign genes to  
818 modules. Parameters for the function were as follows, a minimum module size of 30 genes, a  
819 mergeCutHeight of 0.1, reassignThreshold of 0, and using a signed network.

820 The resultant module definitions were quantified using the eigengene approach within  
821 WGCNA. An eigengene is a quantitative representation of the expression of a module as a  
822 whole and is derived from the first component of a principle components analysis restricted to  
823 the expression data of just the genes in the module. Eigengenes for the modules defined in  
824 the resection data were calculated using the *moduleEigengenes* function.

825 Correlations between clinical and metadata measures and module eigengenes were assessed  
826 using Pearson correlations with p-values estimated using the *corPvalueStudent* function and

827 adjusted for multiple testing. Benjamini-Hochberg correction using the *p.adjust* function was  
828 used for all analyses with adjusted p-values. This was carried out on the inflamed IBD tissue  
829 samples and CRC tissue samples combined and also on the inflamed IBD tissue samples  
830 alone. Eigengenes were also compared between paired inflamed and uninflamed tissues  
831 sections using a t-test, adjusting for multiple testing across modules.

832 Cell type composition scores were estimated for each resection sample using the  
833 *xCellAnalysis* function from the xCell package<sup>19</sup>. Correlations between module eigengenes  
834 and the derived cell type scores were visualized for all cell types scored in over 25% of  
835 samples and used to infer the cell types represented by modules within the whole tissue data  
836 (discovery cohort).

### 837 **Quantifying module associations with clinical variables in replication datasets**

838 Publicly available RNAseq (<sup>15,41</sup> (GSE57945, GSE109142)) or microarray data <sup>20,21</sup>  
839 (GSE16879, GSE12251) were downloaded from the NCBI gene expression omnibus. These  
840 were pre-existing enumerated gene counts in the case of the RNAseq datasets and raw array  
841 data in the case of the microarray sets. The latter were processed and normalised to gene  
842 counts using the *rma* function from the *affy* package<sup>50</sup>, summing values for probes associated  
843 with the same gene symbol. Across all datasets, gene symbol annotations were used to map  
844 the genes to the module assignments generated from the discovery resection tissue dataset,  
845 dropping genes that were not observed in the replication dataset under consideration. The  
846 percentage of genes missing from the original module definitions was recorded but was  
847 generally low across all datasets. Mapped module assignments were then used to generate  
848 eigengenes from the replication expression datasets using the *moduleEigengenes* function.  
849 Correlations between clinical metadata and eigengenes in replication datasets was performed  
850 using Pearson correlations as for the discovery dataset. In the case of the paediatric cohort  
851 data (GSE57945), Mann-Whitney U tests were used to compare the modules between  
852 patients scored as ulcerated or not in metadata and hierarchical clustering used to group  
853 patients based on M4,5, and M6 expression as for the discovery cohort.



854 Differences in pre-treatment module eigengene values between responders and non-  
855 responders in prospective studies were assessed using Mann–Whitney *U* tests, adjusting p-  
856 values for testing of multiple modules within each dataset. In the Haberman et al. 2019 study  
857 we only considered patients on corticosteroid therapy, combining both patients that received  
858 oral and intravenous administration. In the case of the Arijs 2018 study, which tested multiple  
859 different therapies and treatment regimens, we used ANOVA to identify any differences  
860 between responders and non-responders across all combinations adjusting for regimen and  
861 used post-hoc Mann-Whitney U tests to identify individual treatment regimens where modules  
862 were significantly different by response.

863 Meta-analysis of the expression of the M4 and M5 modules across responders and non-  
864 responders in the various replication datasets was carried out using the meta package in R<sup>51</sup>.  
865 The anti-TNF response data was used from the Arijs 2008 and 2018 papers and the  
866 corticosteroid response data was from the Haberman et al. study. Only the 4 week treatment  
867 condition was included from the anti-intergrin data from Arijs 2018, as this was the only one  
868 that proved significantly different for either M4 or M5. A random effects meta-analysis was  
869 carried out comparing standardised mean differences between patient groups using the exact  
870 Hedges estimate.

871 In the prospective cohorts, the predictive value of the expression of single genes for response  
872 to treatment was assessed using a simple logistic regression where response was the  
873 outcome and gene expression the sole predictor. Modelling was carried out for all genes also  
874 observed in the discovery cohort, for each of the prospective studies, using the *glm* function  
875 in R. The predictive ability of each gene in each dataset was summarised as the area under  
876 the curve (AUC) of a receiver operating characteristic (ROC) curve. AUC values for each gene  
877 were generated by applying the *roc* function from the pROC package to predictions generated  
878 from the logistic regression models. The relative predictive power of genes within modules of  
879 interest was compared by summing the rank of genes (based on their AUC value) across  
880 datasets and comparing these cumulative ranks between modules.

## 881 **Pathological scoring of histology using the Nancy index**

882 Formalin-fixed paraffin-embedded (FFPE) and hematoxylin & eosin (H&E)-stained tissue  
883 sections of IBD patients were scored according to the Nancy index, based on criteria reported  
884 in <sup>18</sup>.

## 885 **Immunohistochemistry and quantitative histopathology**

886 Tissue specimens were either fixed for 48 hours in 4% neutral-buffered formalin (Sigma) and  
887 embedded in paraffin ("FFPE"), or fixed for 24 hours in 2% PFA in phosphate buffer containing  
888 L-lysine and Sodium periodate and frozen in OCT (Sigma) after soaking in 30% sucrose for  
889 48 hours ("OCT"). Freshly cut, dewaxed, and rehydrated FFPE sections (5µm) were subjected  
890 to heat-induced antigen retrieval by boiling in Target Retrieval Solution (Dako, pH=6, for all  
891 stainings except neutrophil elastase) for 15minutes (microwave). This was followed by 15  
892 minutes of blocking in Bloxall solution (Vector Labs), 60minutes blocking in 5%BSA/TBST with  
893 5% serum of the secondary antibody species (Sigma), and 15minutes of blocking in avidin  
894 followed by biotin solution (Vector Labs). All steps were performed at ambient temperature.  
895 Tissue sections were incubated with primary antibodies in 5%BSA/TBST overnight (>16  
896 hours) at 4°C. Following incubation, biotinylated or HRP/AP-conjugated secondary antibodies  
897 were applied for 2 hours (RT) in 5% BSA/TBST. For biotinylated secondary antibodies, AB  
898 complex (Vector Labs) was incubated for another hour in TBST (RT). Chromogenic stains  
899 were developed by applying DAB HRP substrate solution (Vector Labs) and counterstained  
900 for 5minutes in Hematoxylin solution (Sigma). Slides were then dehydrated and mounted in  
901 DPX (Sigma) mounting medium.

902 Whole section imaging of chromogenic sections was performed on a NanoZoomer S210 digital  
903 slide scanner (Hamamatsu). Slide scans of all stains can be made available upon request.  
904 Scanned tissue sections, stained using DAB immunohistochemistry, were analysed using  
905 Indica Labs HALO® image analysis platform. A consultant gastrointestinal pathologist  
906 manually annotated each slide, dividing the mucosa into normal and inflamed. The tissue was

907 scored using Indica Labs analysis modules CytoNuclear v2.0.5, detecting DAB positive and  
908 negative cells in inflamed areas. Pathologic features (ulceration/granulation tissue,  
909 granulomas, crypt abscess/cryptitis, lymphoid aggregates and architectural distortion/mucin  
910 depletion) were manually annotated by a consultant pathologist with a special interest in  
911 gastrointestinal pathology. The area of each annotated feature was automatically calculated  
912 by the HALO software. Nuclei (cells) in areas of interested and the whole tissue section were  
913 detected and counted using Indica Labs – CytoNuclear v2.0.9 analysis module. Scores (%)  
914 were normalised to the number of nuclei that were found within a pathological feature over the  
915 total number of nuclei detected in the whole tissue section. These normalised counts were  
916 used to investigate Pearson correlations between features and correlations with module  
917 eigengenes.

918 10µM thick OCT sections were incubated in blocking buffer (PBS1X, 5% Goat serum, 2% FCS  
919 and human FcBlock (Miltenyi) with primary antibodies overnight at 4°C. The next day AF488  
920 Donkey anti Rat, AF647 Donkey anti Goat, AF555 Donkey anti Rabbit or streptavidin-AF568  
921 were applied for 1h at RT in blocking buffer. Finally, nuclei were stained with Hoechst 28332  
922 (Life Technologies) for 15min at RT in blocking buffer and then mounted in ProlongGold  
923 mounting medium (Life Technologies) prior to imaging with the spectral detector of a Zeiss  
924 confocal LSM 880 microscope.

### 925 **Preparation of cells for single-cell RNA sequencing**

926 Four pairs of biopsies were pooled, minced and frozen in 1mL of CryoStor® CS10 (StemCell  
927 Technologies) at -80°C then transferred in LN<sub>2</sub> within 24 hours. Single-cell suspensions from  
928 these endoscopic biopsies were then prepared by thawing, washing and subsequent mincing  
929 of the tissue using surgical scissors. Minced tissue was then subjected to rounds of digestion  
930 in RPM-1640 medium (Sigma) containing 5% FBS (Life Technologies), 5mM HEPES (Sigma),  
931 antibiotics as above, and Liberase TL with DNase I (Sigma). After 30 minutes, digestion  
932 supernatant was taken off, filtered through a cell strainer, spun down, and resuspended in  
933 10ml of PBS containing 5% BSA and 5mM EDTA. Remaining tissue was then topped up with

934 fresh digestion medium until no more cells were liberated from the tissue. Cells were then  
935 stained and FACS-sorted, as described above for live EPCAM-CD45- cells, before being taken  
936 for microfluidic partitioning (see below).

### 937 **10x library preparation, sequencing, and data analysis**

938 Single-cell RNAseq data was generated from disaggregated intestinal tissue sorted for Sorted  
939 CD45-EPCAM- stromal cells. Viable cells were subjected to a standard droplet single-cell  
940 cDNA library preparation protocol. The experimental details to generate cDNA libraries are  
941 described in a separate manuscript  
942 (<https://www.biorxiv.org/content/10.1101/2021.01.11.426253v1>). We demultiplexed FASTQ  
943 files for each 10X library using the Cell Ranger (v3.1.0) mkfastq function <sup>52</sup>. We then mapped  
944 reads to the GRCh38 human genome reference using Kallisto <sup>53</sup> (v0.46.0) and quantified gene  
945 by cell-barcode UMI matrices with Bustools (<https://github.com/BUStools/bustools>) (v0.39.0).  
946 For quantification, we used gene annotations provided by Gencode <sup>54</sup> (release 33), keeping  
947 only protein coding genes and collapsing Ensembl transcripts to unique HGNC approved gene  
948 symbols.

949 We filtered for potentially empty droplets and damaged cells by excluding droplets with fewer  
950 than 500 unique genes and libraries with greater than 20% of reads assigned to mitochondrial  
951 genes. We pooled the resulting high-quality cells from each 10X library into a single cell by  
952 gene UMI matrix. We normalized for read depth with the standard logCP10K normalization  
953 procedure for gene  $g$  and cell  $i$ :

$$954 \quad \log CP10K_{gi} = \log\left(1 + 10^4 \times \frac{UMI_{gi}}{\sum_h UMI_{hi}}\right)$$

955 We performed PCA analysis on the top 2000 most variable genes, identified with the VST  
956 method implemented in the Seurat <sup>55</sup> R package. For PCA, we z-scored each variable gene  
957 and computed the top 30 eigenvectors and singular values with the truncated SVD procedure,  
958 implemented in the RSpectra (<https://github.com/yixuan/RSpectra>) R package. We defined

959 PCA cell embeddings by scaling eigenvectors by their respective singular values. To account  
960 for potential batch effects in the PCA embeddings, we modelled and removed the effect of  
961 10X library as identified using the Harmony algorithm. For Harmony <sup>24</sup>, we set the cluster  
962 diversity penalty parameter  $\theta$  to 0.5 and used default values for all other parameters. We  
963 evaluated the effect of library mixing before and after Harmony using the Local Inverse  
964 Simpson's Index (LISI), described in the Harmony manuscript <sup>24</sup>. We evaluated the  
965 significance of the LISI change with a t-test, with degrees of freedom equal to the number of  
966 libraries minus 1. To visualize the cells in 2 dimensions, we input the Harmonized PCs into  
967 the UMAP (arXiv:1802:03426 [stat.ML]) algorithm.

### 968 **Identification of marker genes within single-cell RNA sequencing**

969 We performed joint clustering analysis on all scRNAseq libraries using the cells' Harmonized  
970 PCA embeddings. With the 30-nearest neighbour graph, we computed the unweighted shared  
971 nearest neighbour (SNN) graph, and truncated SNN similarity values below 1/15 to zero. We  
972 then performed Louvain clustering, based on the R/C++ implementation from Seurat, at  
973 resolution=0.3, resulting in 8 clusters. We identified upregulated marker genes in each cluster  
974 using pseudobulk differential expression with negative binomial regression, implemented in  
975 the DESeq2 R package. For pseudobulk analysis, we collapsed cells from the same donor  
976 and cluster into one pseudobulk sample, summing the UMI counts from each cell. We then  
977 performed differential expression analysis on these pseudobulk samples, with the design  $y \sim$   
978  $1 + cluster$ . This design assigns each gene an intercept term (i.e. mean expression), a  
979 multiplicative offset for each cluster. We addressed the degeneracy of the design matrix by  
980 assigning a Gaussian prior distribution to the cluster effects (DESeq2 parameter  
981  $\beta$ Prior=TRUE). The full results for this differential expression analysis are reported in  
982 Supplementary Table 9.

### 983 **Differential expression analysis of single-cell data by inflammatory status**

984 We performed differential expression to associate genes with inflammation status within each  
985 single-cell cluster. We used DESeq2 on the pseudobulk samples described above, this time  
986 analysing each cluster separately with the design  $y \sim 1 + \text{InflamStatus}$ . We treated  
987 InflamStatus as a random effect (DESeq2 parameter  $\beta\text{Prior}=\text{TRUE}$ ) and recovered a mean  
988 multiplicative offset for each of the three inflammatory status categories.

### 989 **Single-cell gene set enrichment scoring**

990 Single-cell gene-set enrichment scores were computed for WGCNA modules and cytokine  
991 stimulation signatures using the same strategy. For each gene in the gene set, we computed  
992 Z scores (mean centred and unit variance scaled) of logCP10K normalized expression across  
993 all cells. Then we summed the Z-scores of genes in the gene set to compute a single gene  
994 set score for each cell. This procedure is summarized in the formula below, used to compute  
995 the score  $S_{G,i}$  for geneset  $G$  and cell  $i$  using normalized expression  $y_{gi}$ , gene mean  $\mu_g$ , and  
996 gene standard deviation  $\sigma_g$ .

$$997 \quad \text{score}_{G,i} = \sum_{g \in G} (y_{gi} - \mu_g) / \sigma_g$$

### 998 **Single-cell trajectory analysis**

999 We performed trajectory using the principal curve method, implemented in the princurve R  
1000 package (<https://www.jstor.org/stable/2289936>). We fit a principal curve to all fibroblasts by  
1001 inputting harmonized UMAP coordinates into the principal\_curve function. This mapped  
1002 fibroblasts to a non-linear, one dimensional space and assigned each cell a unique position,  
1003 from 0 to 100, along this trajectory. To directly visualize the abundance of each cluster along  
1004 the trajectory, we plotted the relative density of each cluster along the trajectory. In these  
1005 density plots, ABCA8<sup>+</sup> fibroblasts grouped towards the beginning (position=32) of the  
1006 trajectory, PDPN<sup>+</sup> fibroblasts in the middle (position=59), and PDGFRA<sup>+</sup> fibroblasts towards  
1007 the end (position=82). This distribution along the trajectory is also reflected by the canonical  
1008 markers of these populations. To visualize this, we discretized pseudotime by binning into 100

1009 uniform-density windows, chosen so that each window has the same number of cells. We then  
1010 plotted the scaled gene expression values of ABCA8, PDPN, and PDGFRA, summarized by  
1011 mean expression (point) and 95% confidence interval (line).

## 1012 **Data and Code availability**

1013 RNA sequencing data will be made accessible via GEO (bulk) and ImmPort (single-cell), and  
1014 all analysis code will be made available through a GitHub repository at  
1015 <https://github.com/microbialman/IBDTherapyResponsePaper>.

## 1016 **Extended Data**

1017 **Extended Data Figure 1.** A) Scatterplot of the module expression difference between  
1018 inflamed and uninflamed tissues paired from the same patients versus the correlation of the  
1019 module with the Nancy score across all IBD and non-IBD tissues. Points highlighted with a  
1020 diamond indicate a significant difference in paired t-test between inflamed/uninflamed tissue  
1021 (FDR  $p < 0.1$ ). B) Heatmap of module eigengene – cell type correlations; cell types were  
1022 deconvoluted from whole tissue expression data using *xCell*. Modules highlighted in bold  
1023 were found to be associated with histologic inflammation. C) Percentage of genes within each  
1024 module that were detectable in the publicly available datasets. Bars show mean and standard  
1025 error across all modules for each dataset.<sup>15,20,21</sup>

1026 **Extended Data Figure 2.** A) Clinical and endoscopic measures in responders and non-  
1027 responders to anti-TNF therapy before the start of treatment (horizontal bars indicate  
1028 geometric mean, Wilcoxon signed rank test P values are given). B) Representative images of  
1029 the various pathological features quantified on H&E histology of resected tissue from IBD  
1030 patients. C) Correlation plot of histological features, quantified as the % of nuclei within the  
1031 feature area relative to the nuclei with the total section area. Numbers and colours in upper  
1032 right corner indicate the Pearson correlation coefficient; histograms on diagonal show the  
1033 value distribution of the features within IBD patient tissues; scatter plots in the lower left corner  
1034 show the individual datapoints. D) Violin plots of eigengene expression of M4, M5 and M6 in

1035 inflamed tissues of IBD patients with or without deep ulceration observed in a replication cohort  
1036 of paediatric CD and UC (n=172). E) Classification of M4/M5 high and M4/M5 low patients in  
1037 the paediatric replication cohort, based on hierarchical clustering on module eigengene  
1038 values.

1039 **Extended Data Figure 3.** A) Gating strategy for FACS sorting of hematopoietic and non-  
1040 hematopoietic cell populations from non-IBD and IBD patient tissue. B) Normalised gene  
1041 expression (qPCR, relative to *RPLP0* expression) of selected genes from M4 and M5 in cell  
1042 populations sorted as in A. C) FACS-gating strategy for sorting of neutrophils, stromal cells  
1043 and MNPs from tissue samples of IBD patients. D) Gene set enrichment analysis using Gene  
1044 Ontology (GO) Cellular Components pathway terms, based on all genes significantly enriched  
1045 ( $p$  adjusted  $<0.05$ ,  $|\log_2$  fold change $| > 2$ ) in either neutrophils MNPs or stromal cells  
1046 (Supplementary Table 8). E+F) Heatmaps of whole tissue gene expression of selected genes  
1047 that are representative (=highly correlative) of M4 and M5 expression (qPCR, z-score  
1048 transformed gene expression values); unsupervised clustering (Manhattan) distinguishes  
1049 subgrouping into M4/M5 low, intermediate and high samples; the box-plots on the right show  
1050 the eigenvalues of all detected genes on a per patient basis. The respective heatmaps refer  
1051 to tissue samples used for FACS analysis (E) and IHC analysis (F) as shown in Figures 3D,  
1052 F and G.

1053 **Extended Data Figure 4.** A) Heatmap of whole tissue gene expression of selected genes that  
1054 are representative of (highly correlated with) M4 and M5 expression (qPCR, z-score  
1055 transformed gene expression values); unsupervised clustering (Manhattan) groups samples  
1056 into M4/M5 low, intermediate and high from the set of IBD patients whose samples were  
1057 profiled by single cell RNA sequencing; the box-plots on the right show the eigenvalues of all  
1058 detected genes on a per patient basis. B) Immunofluorescent staining of ABCA8 (red),  
1059 PDGFRA (yellow), THY1 (blue), Podoplanin (PDPN, green) and nuclei (Hoechst, grey) in  
1060 ileum and colon of resected tissue from IBD patients (not inflamed). C) Immunostaining  
1061 of PECAM1 (red), MCAM (orange) THY1 (blue), Podoplanin (PDPN, green) and nuclei



1062 (Hoechst, grey) in ileum and colonic resected tissue from IBD patients (not inflamed). D) Box  
1063 plot showing the proportion of the cell types in M4/M5 low, intermediate and high groups, as  
1064 detected by scRNAseq. E) FACS analysis of live stromal cells (CD45-, EPCAM-) in resected  
1065 tissue from an IBD patient (adjacent not inflamed and inflamed tissue). Gates for endothelial  
1066 cells (PECAM1+), Pericytes (THY+, PDPN-), ABCA8+fibroblasts (THY1 high, PDGFRA low),  
1067 PDGFRA+ fibroblasts (PDGFRA high , THY1 low) and inflammatory fibroblasts (FAP+) are  
1068 shown. F) Pseudotime analysis of ABCA8+, PDGFRA+ and inflammatory fibroblasts in the  
1069 single-cell dataset. Cell densities (top row) or canonical markers (bottom) are shown along the  
1070 trajectory, binned to 100 uniform-density windows (each window has the same number of  
1071 cells). G) Representative immunofluorescent stainings of PDGFRA (yellow) and ABCA (red)  
1072 staining on fibroblasts in paired inflamed and uninflamed samples of the same IBD patient.

1073 **Extended Data Figure 5.** A) Primary fibroblast cell lines (n=33) culture-expanded from  
1074 resected IBD patient tissue and stimulated for 3h with recombinant cytokines (adjusted P-  
1075 values are shown where significantly different ( $p < 0.05$ ) compared to unstimulated, Kruskal-  
1076 Wallis test). B) RNAseq analysis (Salmon log<sub>2</sub>-transformed TPM values, z-score, see STAR  
1077 Methods) of cultured intestinal fibroblast cell line Ccd18-co, stimulated with either TNF- $\alpha$   
1078 (100ng/ml) or IL-1 $\beta$  (0.01ng.ml) for 3 hours (\* P adjusted < 0.05 from DESeq2 differential gene  
1079 expression analysis (see STAR Methods)). C) Dose-response of IL-1 $\beta$  and TNF- $\alpha$  stimulated  
1080 Ccd18co fibroblasts for gene expression fold change (FC) of *CXCL8* over unstimulated,  
1081 measured by qPCR. D) Pseudo-bulk expression fold changes (relative to M4/M5 low groups)  
1082 of *ILR1* and *TNFR1* (see Supplementary Table 10) within the cellular clusters detected as in  
1083 Figure 3A, across patients with either low, intermediate or high M4/M5 whole tissue  
1084 expression. E) Gene set enrichment analysis of all modules detected in the discovery cohort  
1085 for genes assigned to inflammasome pathways (GO:0061702).

1086 **Supplementary Table 1. Clinical characteristics of the Oxford IBD patient discovery**  
1087 **cohort used in this study.** Samples from the discovery cohort consist of surgically removed  
1088 tissue of CD and UC patients (=IBD), as well as surgically removed normal tissue adjacent to

1089 colorectal tumours (= non-IBD). IBD, inflammatory bowel disease; CD, Crohn's Disease; UC,  
1090 Ulcerative colitis; IQR, interquartile range; n/a, not applicable.

1091 **Supplementary Table 2. Detailed WGCNA analysis results.** Gene IDs and gene names of  
1092 genes contained in the detected modules (modules\_genes). Gene set enrichment analysis  
1093 (fgsea) results of top 10 pathways upregulated in the detected modules (module GO analysis).  
1094 Correlation strength (\_Cor) and adjusted significance (\_Pvalue) for correlation of individual  
1095 modules with metadata traits across the inflamed IBD and CRC tissue samples (module-trait  
1096 correlations).

1097 **Supplementary Table 3. Replication of modules defined in the discovery cohort in other**  
1098 **datasets.** Replication of the modules identified in the discovery cohort in publicly available  
1099 datasets of IBD whole tissue gene expression.

1100 **Supplementary Table 4. Differential expression of replication set modules in relation to**  
1101 **therapy-response.** Significance test (Wilcoxon signed rank test) results for difference in  
1102 module (eigengene value) expression between responders and non-responders to anti-TNF  
1103 <sup>20</sup>, corticosteroid <sup>15</sup> and anti-integrin <sup>21</sup> therapy, before the start of treatment.

1104 **Supplementary Table 5. Predictive power of individual genes for therapy non-response.**  
1105 Ranking of genes contained in all modules and detected in given dataset by area-under-the-  
1106 curve (AUC) to predict non-response to anti-TNF <sup>20</sup>, corticosteroid <sup>15</sup> and anti-integrin <sup>21</sup>  
1107 therapy. Combined (summed) ranks for both anti-TNF and corticosteroid response are also  
1108 shown.

1109 **Supplementary Table 6. Clinical characteristics of the Oxford UC patient cohort of**  
1110 **response to anti-TNF therapy.** Response to therapy in this UC patient cohort was defined  
1111 as stopping anti-TNF therapy (Infliximab or Adalimumab) within 12 months of start, for reason  
1112 of non-response (patients that stopped therapy for convenience, switch to biosimilar, or  
1113 intolerance were not considered). Nancy histologic scores and UCEIS endoscopic scores, as  
1114 well as the other characteristics, within 3 months before the start of anti-TNF therapy are

1115 shown. UC, Ulcerative colitis; IQR, interquartile range; UCEIS, Ulcerative Colitis Endoscopic  
1116 Index of Severity.

1117 **Supplementary Table 7. Clinical characteristics of the IBD patients used for RNAseq**  
1118 **and FACS analysis.** Clinical characteristics of the IBD patient cohorts used for the  
1119 transcriptomic and FACS analysis. UC, Ulcerative colitis; IQR, interquartile range; UCEIS,  
1120 Ulcerative Colitis Endoscopic Index of Severity.

1121 **Supplementary Table 8. Differential gene expression between neutrophils, stromal cells**  
1122 **and mononuclear phagocytes FACS-sorted from IBD patient tissue.** List of all significant  
1123 (adjusted P value < 0.05,  $|\log_2\text{foldchange}| > 2$ ) differentially expressed genes between  
1124 neutrophils, stromal cells and MNPs sorted from the intestine of IBD patients. The standard  
1125 DESeq2 outputs are reported.

1126 **Supplementary Table 9. Differential gene expression between stromal cell clusters**  
1127 **detected through scRNAseq.** Differential expression was performed to associate gene  
1128 expression with stromal clusters comparing each cluster to all others irrespective of M4/M5  
1129 expression status. The standard DESeq2 outputs are reported.

1130 **Supplementary Table 10. Differential gene expression between stromal cell clusters**  
1131 **within M4/M5 high tissues only.** Differential expression was performed to associate gene  
1132 expression with stromal clusters comparing each cluster to all others clusters within M4/M5  
1133 tissues only. The standard DESeq2 outputs are reported.

1134 **Supplementary Table 11. Differential gene expression between inflammation states and**  
1135 **clusters detected through scRNAseq.** For each gene (column feature), gene expression  
1136 was associated with the tissue sample's overall inflammatory status (column  
1137 inflammatory\_status), separately within each stromal cluster (column cell\_type). The  
1138 remaining columns are standard outputs of DESeq2.

1139 **Supplementary Table 12. Differentially expressed genes in Ccd18-Co fibroblasts upon**  
1140 **IL-1 $\beta$  stimulation.** List of all significant (adjusted P value < 0.05) differentially expressed

1141 genes in Ccd18-co fibroblasts after 3hour stimulations with IL-1 $\beta$  (0.01 ng/ml). The standard  
1142 DESeq2 outputs are reported. log2FoldChange is the IL-1 $\beta$ -specific fold change over  
1143 unstimulated condition.

## 1144 References

- 1145 1. Uhlig, H.H. & Powrie, F. Translating Immunology into Therapeutic Concepts for Inflammatory  
1146 Bowel Disease. *Annu Rev Immunol* **36**, 755-781 (2018).
- 1147 2. Ungaro, R., Mehandru, S., Allen, P.B., Peyrin-Biroulet, L. & Colombel, J.F. Ulcerative colitis.  
1148 *Lancet* **389**, 1756-1770 (2017).
- 1149 3. Torres, J., Mehandru, S., Colombel, J.F. & Peyrin-Biroulet, L. Crohn's disease. *Lancet* **389**,  
1150 1741-1755 (2017).
- 1151 4. Friedrich, M., Pohin, M. & Powrie, F. Cytokine Networks in the Pathophysiology of Inflammatory  
1152 Bowel Disease. *Immunity* **50**, 992-1006 (2019).
- 1153 5. Abraham, C., Dulai, P.S., Vermeire, S. & Sandborn, W.J. Lessons Learned From Trials  
1154 Targeting Cytokine Pathways in Patients With Inflammatory Bowel Diseases. *Gastroenterology*  
1155 **152**, 374-388 e374 (2017).
- 1156 6. Neurath, M.F. Targeting immune cell circuits and trafficking in inflammatory bowel disease. *Nat*  
1157 *Immunol* **20**, 970-979 (2019).
- 1158 7. Ding, N.S., Hart, A. & De Cruz, P. Systematic review: predicting and optimising response to  
1159 anti-TNF therapy in Crohn's disease - algorithm for practical management. *Aliment Pharmacol*  
1160 *Ther* **43**, 30-51 (2016).
- 1161 8. Roda, G., Jharap, B., Neeraj, N. & Colombel, J.F. Loss of Response to Anti-TNFs: Definition,  
1162 Epidemiology, and Management. *Clin Transl Gastroenterol* **7**, e135 (2016).
- 1163 9. Kennedy, N.A., *et al.* Predictors of anti-TNF treatment failure in anti-TNF-naive patients with  
1164 active luminal Crohn's disease: a prospective, multicentre, cohort study. *Lancet Gastroenterol*  
1165 *Hepatol* **4**, 341-353 (2019).
- 1166 10. West, N.R., *et al.* Oncostatin M drives intestinal inflammation and predicts response to tumor  
1167 necrosis factor-neutralizing therapy in patients with inflammatory bowel disease. *Nat Med* **23**,  
1168 579-589 (2017).
- 1169 11. Martin, J.C., *et al.* Single-Cell Analysis of Crohn's Disease Lesions Identifies a Pathogenic  
1170 Cellular Module Associated with Resistance to Anti-TNF Therapy. *Cell* **178**, 1493-1508 e1420  
1171 (2019).
- 1172 12. Smillie, C.S., *et al.* Intra- and Inter-cellular Rewiring of the Human Colon during Ulcerative  
1173 Colitis. *Cell* **178**, 714-730 e722 (2019).
- 1174 13. Huang, B., *et al.* Mucosal Profiling of Pediatric-Onset Colitis and IBD Reveals Common  
1175 Pathogenics and Therapeutic Pathways. *Cell* **179**, 1160-1176 e1124 (2019).
- 1176 14. Czarnewski, P., *et al.* Conserved transcriptomic profile between mouse and human colitis  
1177 allows unsupervised patient stratification. *Nat Commun* **10**, 2892 (2019).
- 1178 15. Haberman, Y., *et al.* Ulcerative colitis mucosal transcriptomes reveal mitochondriopathy and  
1179 personalized mechanisms underlying disease severity and treatment response. *Nat Commun*  
1180 **10**, 38 (2019).
- 1181 16. Aschenbrenner, D., *et al.* Deconvolution of monocyte responses in inflammatory bowel disease  
1182 reveals an IL-1 cytokine network that regulates IL-23 in genetic and acquired IL-10 resistance.  
1183 *Gut* (2020).
- 1184 17. Gaujoux, R., *et al.* Cell-centred meta-analysis reveals baseline predictors of anti-TNFalpha  
1185 non-response in biopsy and blood of patients with IBD. *Gut* **68**, 604-614 (2019).
- 1186 18. Marchal-Bressenot, A., *et al.* Development and validation of the Nancy histological index for  
1187 UC. *Gut* **66**, 43-49 (2017).
- 1188 19. Aran, D., Hu, Z. & Butte, A.J. xCell: digitally portraying the tissue cellular heterogeneity  
1189 landscape. *Genome Biol* **18**, 220 (2017).
- 1190 20. Arijs, I., *et al.* Mucosal gene signatures to predict response to infliximab in patients with  
1191 ulcerative colitis. *Gut* **58**, 1612-1619 (2009).
- 1192 21. Arijs, I., *et al.* Effect of vedolizumab (anti-alpha4beta7-integrin) therapy on histological healing  
1193 and mucosal gene expression in patients with UC. *Gut* **67**, 43-52 (2018).

- 1194 22. Chapuy, L. & Sarfati, M. Single-Cell Protein and RNA Expression Analysis of Mononuclear  
1195 Phagocytes in Intestinal Mucosa and Mesenteric Lymph Nodes of Ulcerative Colitis and  
1196 Crohn's Disease Patients. *Cells* **9**(2020).
- 1197 23. de Saint-Vis, B., *et al.* A novel lysosome-associated membrane glycoprotein, DC-LAMP,  
1198 induced upon DC maturation, is transiently expressed in MHC class II compartment. *Immunity*  
1199 **9**, 325-336 (1998).
- 1200 24. Korsunsky, I., *et al.* Fast, sensitive and accurate integration of single-cell data with Harmony.  
1201 *Nat Methods* **16**, 1289-1296 (2019).
- 1202 25. Kinchen, J., *et al.* Structural Remodeling of the Human Colonic Mesenchyme in Inflammatory  
1203 Bowel Disease. *Cell* **175**, 372-386 e317 (2018).
- 1204 26. Wei, K., *et al.* Notch signalling drives synovial fibroblast identity and arthritis pathology. *Nature*  
1205 **582**, 259-264 (2020).
- 1206 27. Cassatella, M.A., Ostberg, N.K., Tamassia, N. & Soehnlein, O. Biological Roles of Neutrophil-  
1207 Derived Granule Proteins and Cytokines. *Trends Immunol* **40**, 648-664 (2019).
- 1208 28. Leoni, G., Neumann, P.A., Sumagin, R., Denning, T.L. & Nusrat, A. Wound repair: role of  
1209 immune-epithelial interactions. *Mucosal Immunol* **8**, 959-968 (2015).
- 1210 29. Dvorak, H.F. Tumors: wounds that do not heal. Similarities between tumor stroma generation  
1211 and wound healing. *N Engl J Med* **315**, 1650-1659 (1986).
- 1212 30. Bersudsky, M., *et al.* Non-redundant properties of IL-1alpha and IL-1beta during acute colon  
1213 inflammation in mice. *Gut* **63**, 598-609 (2014).
- 1214 31. Scarpa, M., *et al.* The epithelial danger signal IL-1alpha is a potent activator of fibroblasts and  
1215 reactivator of intestinal inflammation. *Am J Pathol* **185**, 1624-1637 (2015).
- 1216 32. Boyapati, R.K., Rossi, A.G., Satsangi, J. & Ho, G.T. Gut mucosal DAMPs in IBD: from  
1217 mechanisms to therapeutic implications. *Mucosal Immunol* **9**, 567-582 (2016).
- 1218 33. Atreya, R. & Neurath, M.F. Current and Future Targets for Mucosal Healing in Inflammatory  
1219 Bowel Disease. *Visc Med* **33**, 82-88 (2017).
- 1220 34. Bank, S., *et al.* Associations between functional polymorphisms in the NFkappaB signaling  
1221 pathway and response to anti-TNF treatment in Danish patients with inflammatory bowel  
1222 disease. *Pharmacogenomics J* **14**, 526-534 (2014).
- 1223 35. Siegmund, B., Lehr, H.A., Fantuzzi, G. & Dinarello, C.A. IL-1 beta -converting enzyme  
1224 (caspase-1) in intestinal inflammation. *Proc Natl Acad Sci U S A* **98**, 13249-13254 (2001).
- 1225 36. Coccia, M., *et al.* IL-1beta mediates chronic intestinal inflammation by promoting the  
1226 accumulation of IL-17A secreting innate lymphoid cells and CD4(+) Th17 cells. *J Exp Med* **209**,  
1227 1595-1609 (2012).
- 1228 37. Castro-Dopico, T., *et al.* Anti-commensal IgG Drives Intestinal Inflammation and Type 17  
1229 Immunity in Ulcerative Colitis. *Immunity* **50**, 1099-1114 e1010 (2019).
- 1230 38. Levy, M., *et al.* Severe early-onset colitis revealing mevalonate kinase deficiency. *Pediatrics*  
1231 **132**, e779-783 (2013).
- 1232 39. Shouval, D.S., *et al.* Interleukin 1beta Mediates Intestinal Inflammation in Mice and Patients  
1233 With Interleukin 10 Receptor Deficiency. *Gastroenterology* **151**, 1100-1104 (2016).
- 1234 40. Thomas, M.G., *et al.* Trial summary and protocol for a phase II randomised placebo-controlled  
1235 double-blinded trial of Interleukin 1 blockade in Acute Severe Colitis: the IASO trial. *BMJ Open*  
1236 **9**, e023765 (2019).
- 1237 41. Haberman, Y., *et al.* Pediatric Crohn disease patients exhibit specific ileal transcriptome and  
1238 microbiome signature. *J Clin Invest* **124**, 3617-3633 (2014).
- 1239 42. Picelli, S., *et al.* Smart-seq2 for sensitive full-length transcriptome profiling in single cells. *Nat*  
1240 *Methods* **10**, 1096-1098 (2013).
- 1241 43. Lamble, S., *et al.* Improved workflows for high throughput library preparation using the  
1242 transposome-based Nextera system. *BMC Biotechnol* **13**, 104 (2013).
- 1243 44. Kim, D., Langmead, B. & Salzberg, S.L. HISAT: a fast spliced aligner with low memory  
1244 requirements. *Nat Methods* **12**, 357-360 (2015).
- 1245 45. Liao, Y., Smyth, G.K. & Shi, W. featureCounts: an efficient general purpose program for  
1246 assigning sequence reads to genomic features. *Bioinformatics* **30**, 923-930 (2014).
- 1247 46. Patro, R., Duggal, G., Love, M.I., Irizarry, R.A. & Kingsford, C. Salmon provides fast and bias-  
1248 aware quantification of transcript expression. *Nat Methods* **14**, 417-419 (2017).
- 1249 47. Love, M.I., Huber, W. & Anders, S. Moderated estimation of fold change and dispersion for  
1250 RNA-seq data with DESeq2. *Genome Biol* **15**, 550 (2014).
- 1251 48. Yu, G., Wang, L.G., Han, Y. & He, Q.Y. clusterProfiler: an R package for comparing biological  
1252 themes among gene clusters. *OMICS* **16**, 284-287 (2012).

- 1253 49. Langfelder, P. & Horvath, S. WGCNA: an R package for weighted correlation network analysis.  
1254 *BMC Bioinformatics* **9**, 559 (2008).
- 1255 50. Gautier, L., Cope, L., Bolstad, B.M. & Irizarry, R.A. affy--analysis of Affymetrix GeneChip data  
1256 at the probe level. *Bioinformatics* **20**, 307-315 (2004).
- 1257 51. Balduzzi, S., Rucker, G. & Schwarzer, G. How to perform a meta-analysis with R: a practical  
1258 tutorial. *Evid Based Ment Health* **22**, 153-160 (2019).
- 1259 52. Zheng, G.X., *et al.* Massively parallel digital transcriptional profiling of single cells. *Nat Commun*  
1260 **8**, 14049 (2017).
- 1261 53. Bray, N.L., Pimentel, H., Melsted, P. & Pachter, L. Near-optimal probabilistic RNA-seq  
1262 quantification. *Nat Biotechnol* **34**, 525-527 (2016).
- 1263 54. Harrow, J., *et al.* GENCODE: the reference human genome annotation for The ENCODE  
1264 Project. *Genome Res* **22**, 1760-1774 (2012).
- 1265 55. Stuart, T., *et al.* Comprehensive Integration of Single-Cell Data. *Cell* **177**, 1888-1902 e1821  
1266 (2019).

1267

1268

1269

1270

1271

1272

1273

1274

1275

1276

1277

1278

1279

1280

1281

1282

1283

1284

1285

1286



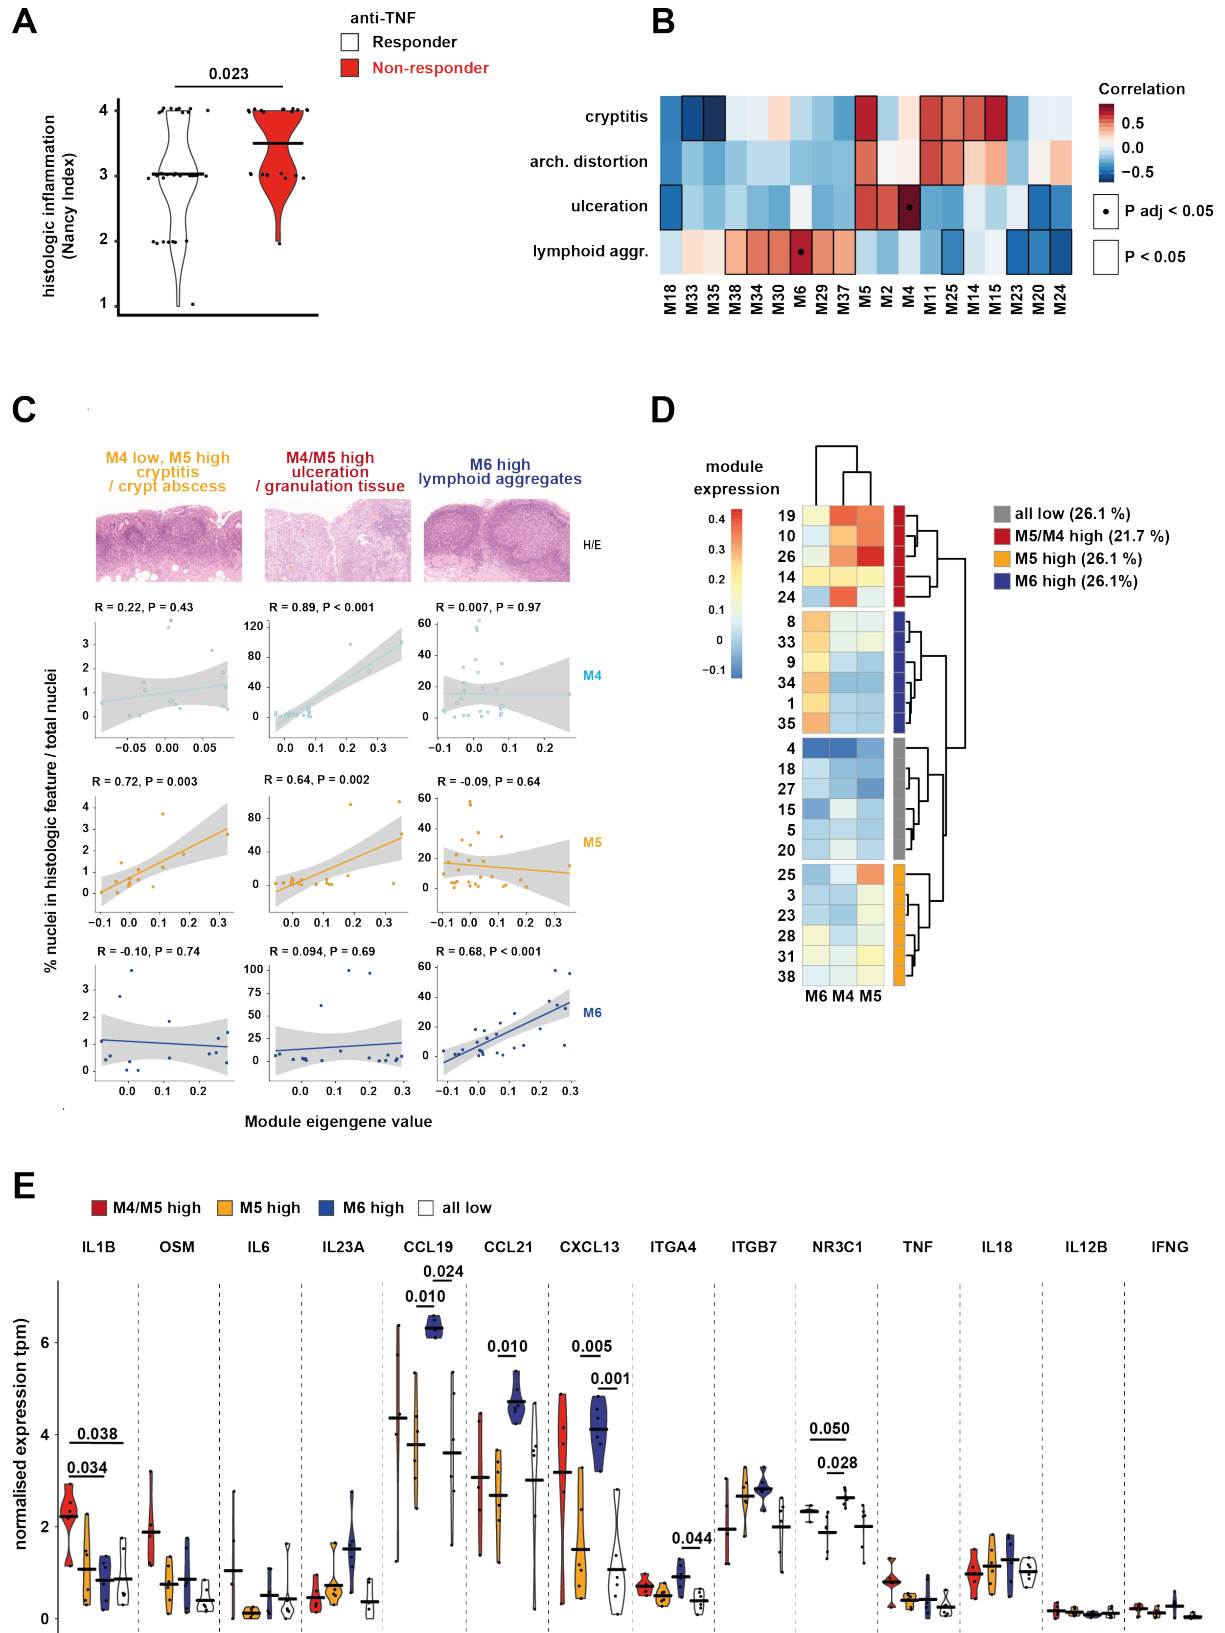

Figure 2



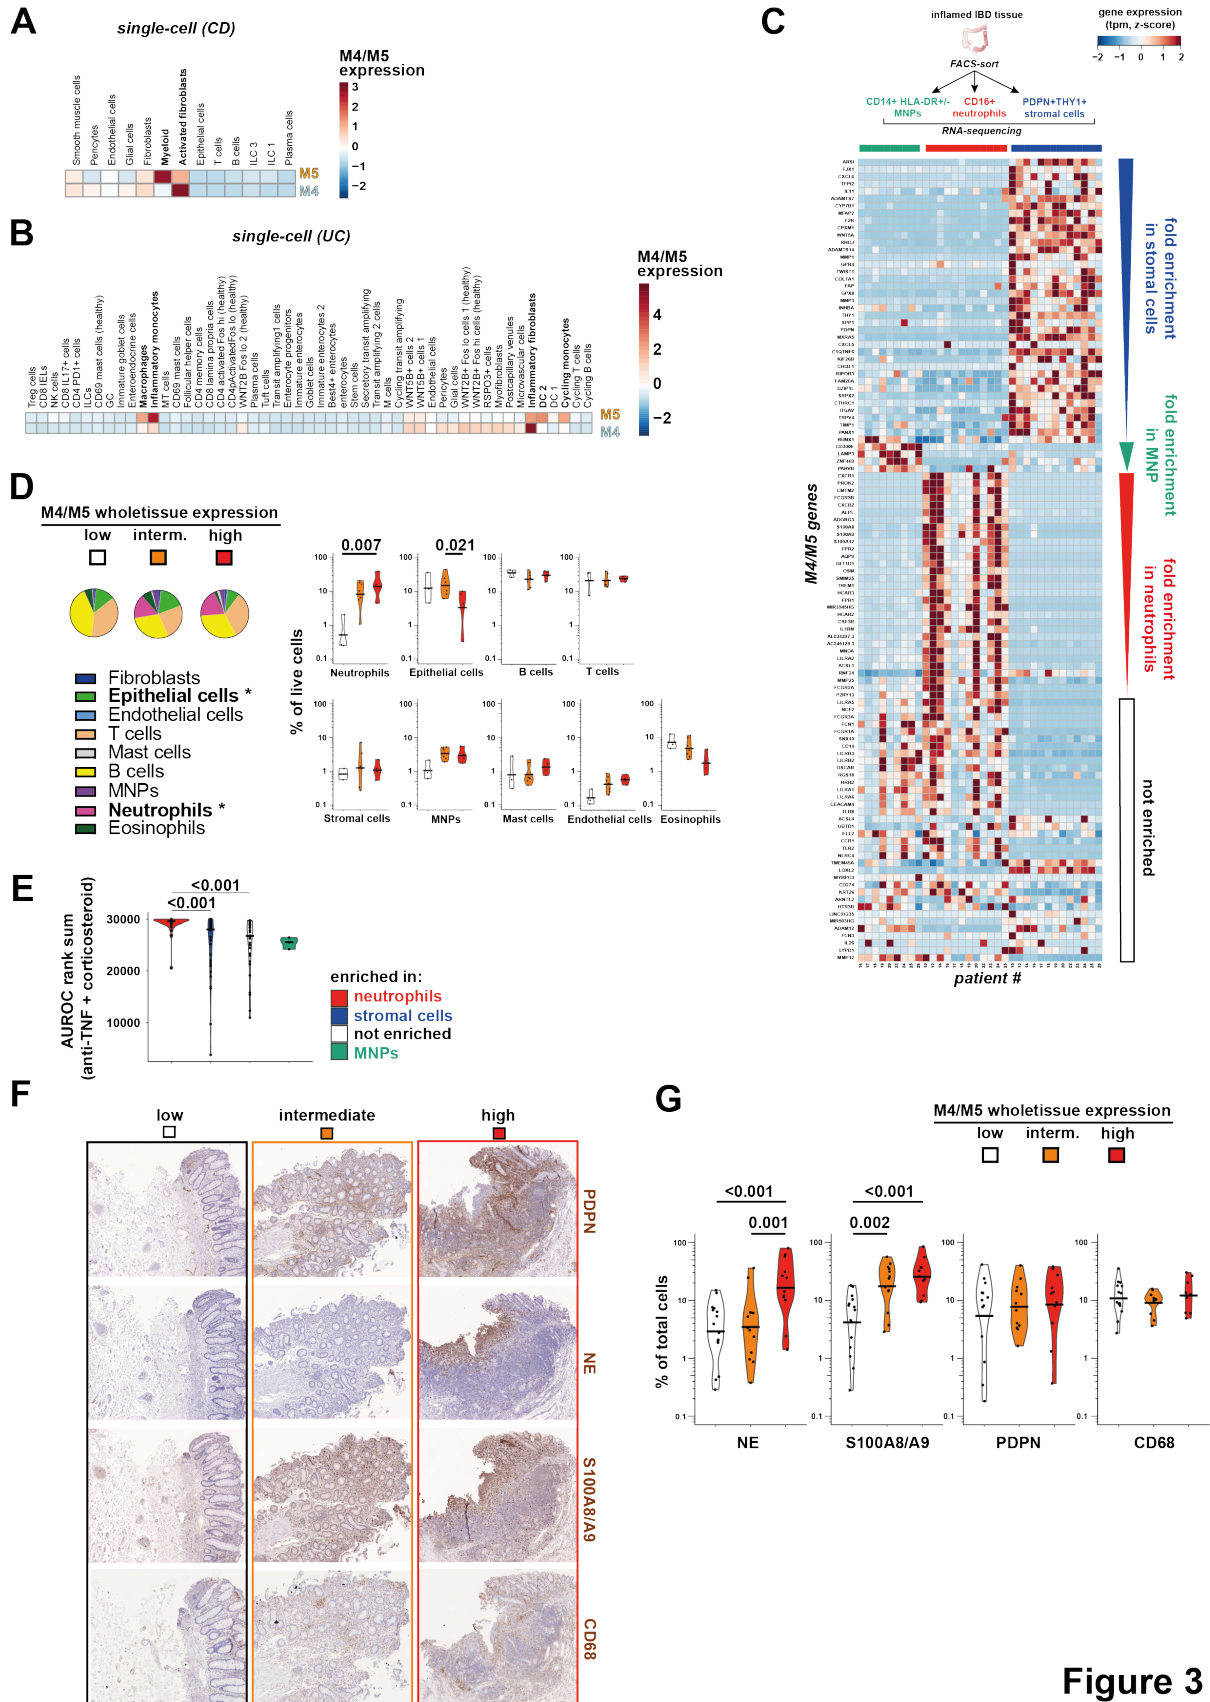

Figure 3

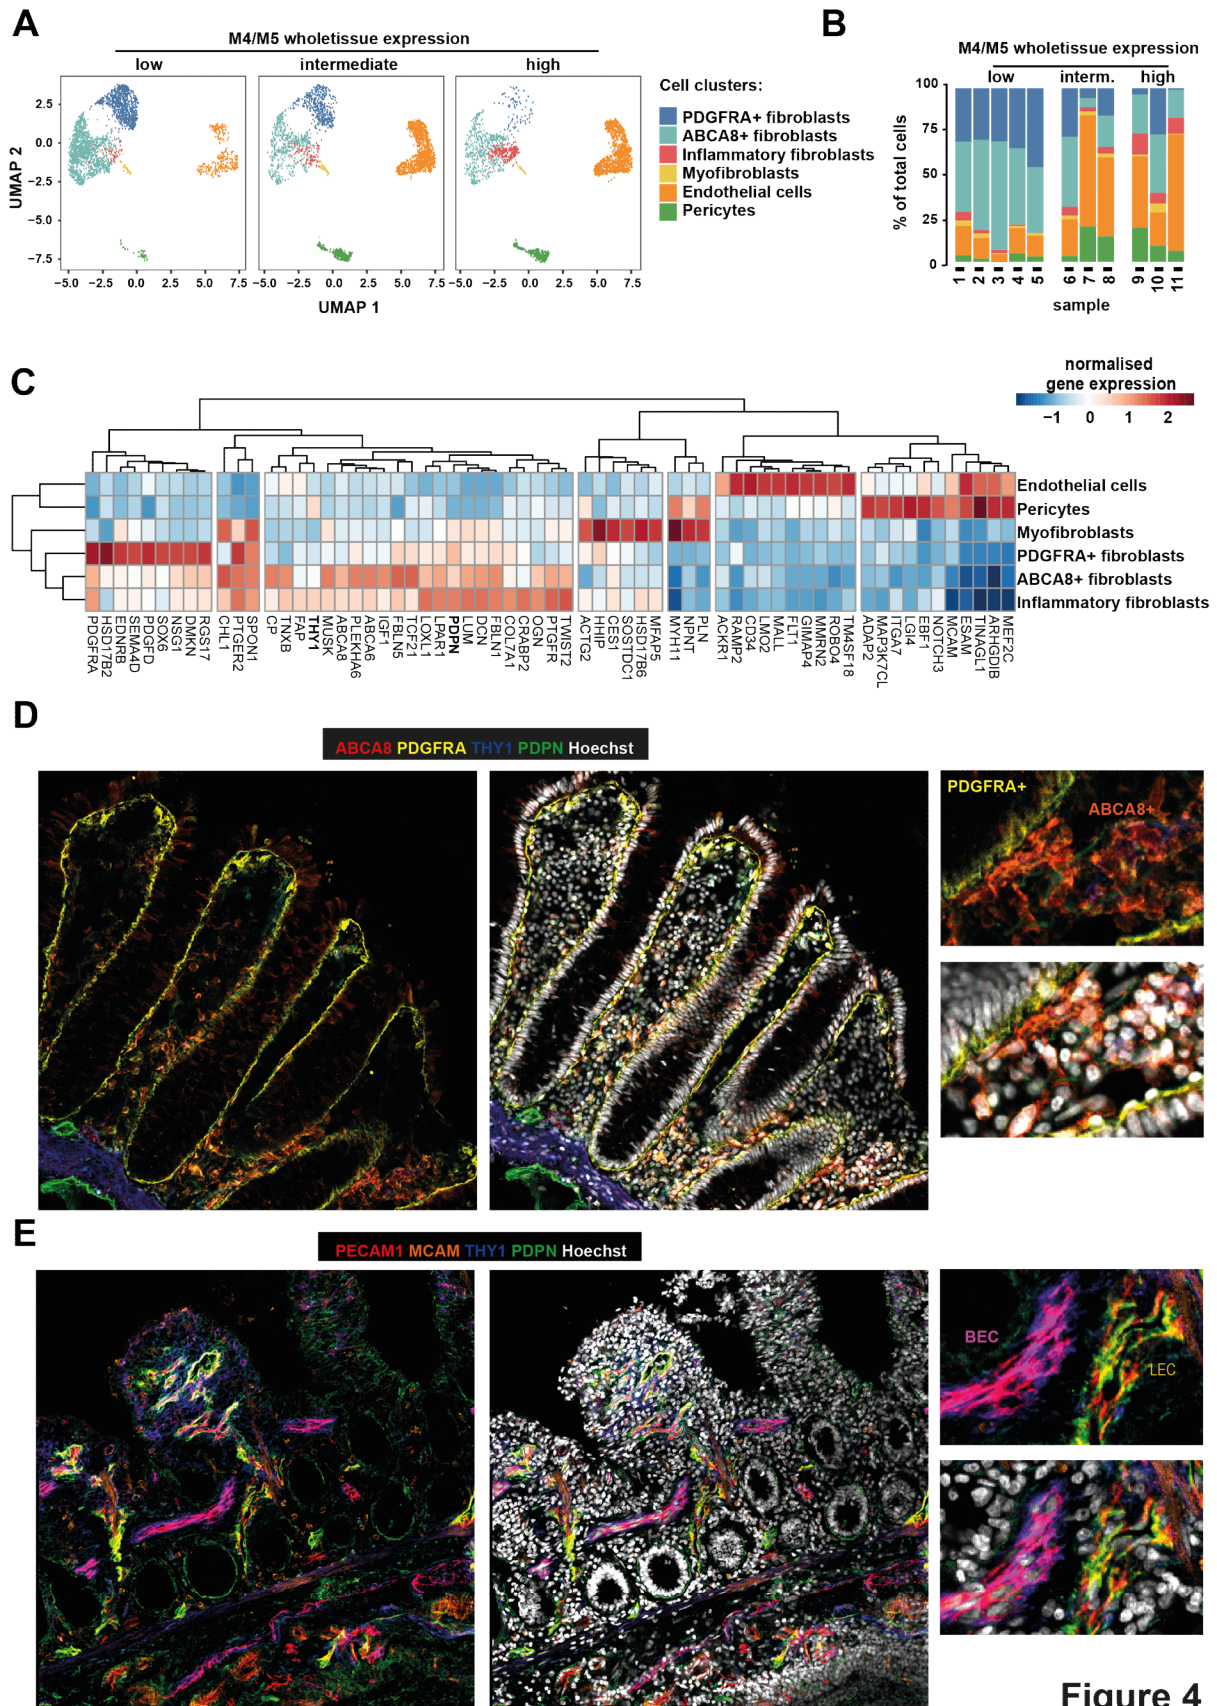

Figure 4

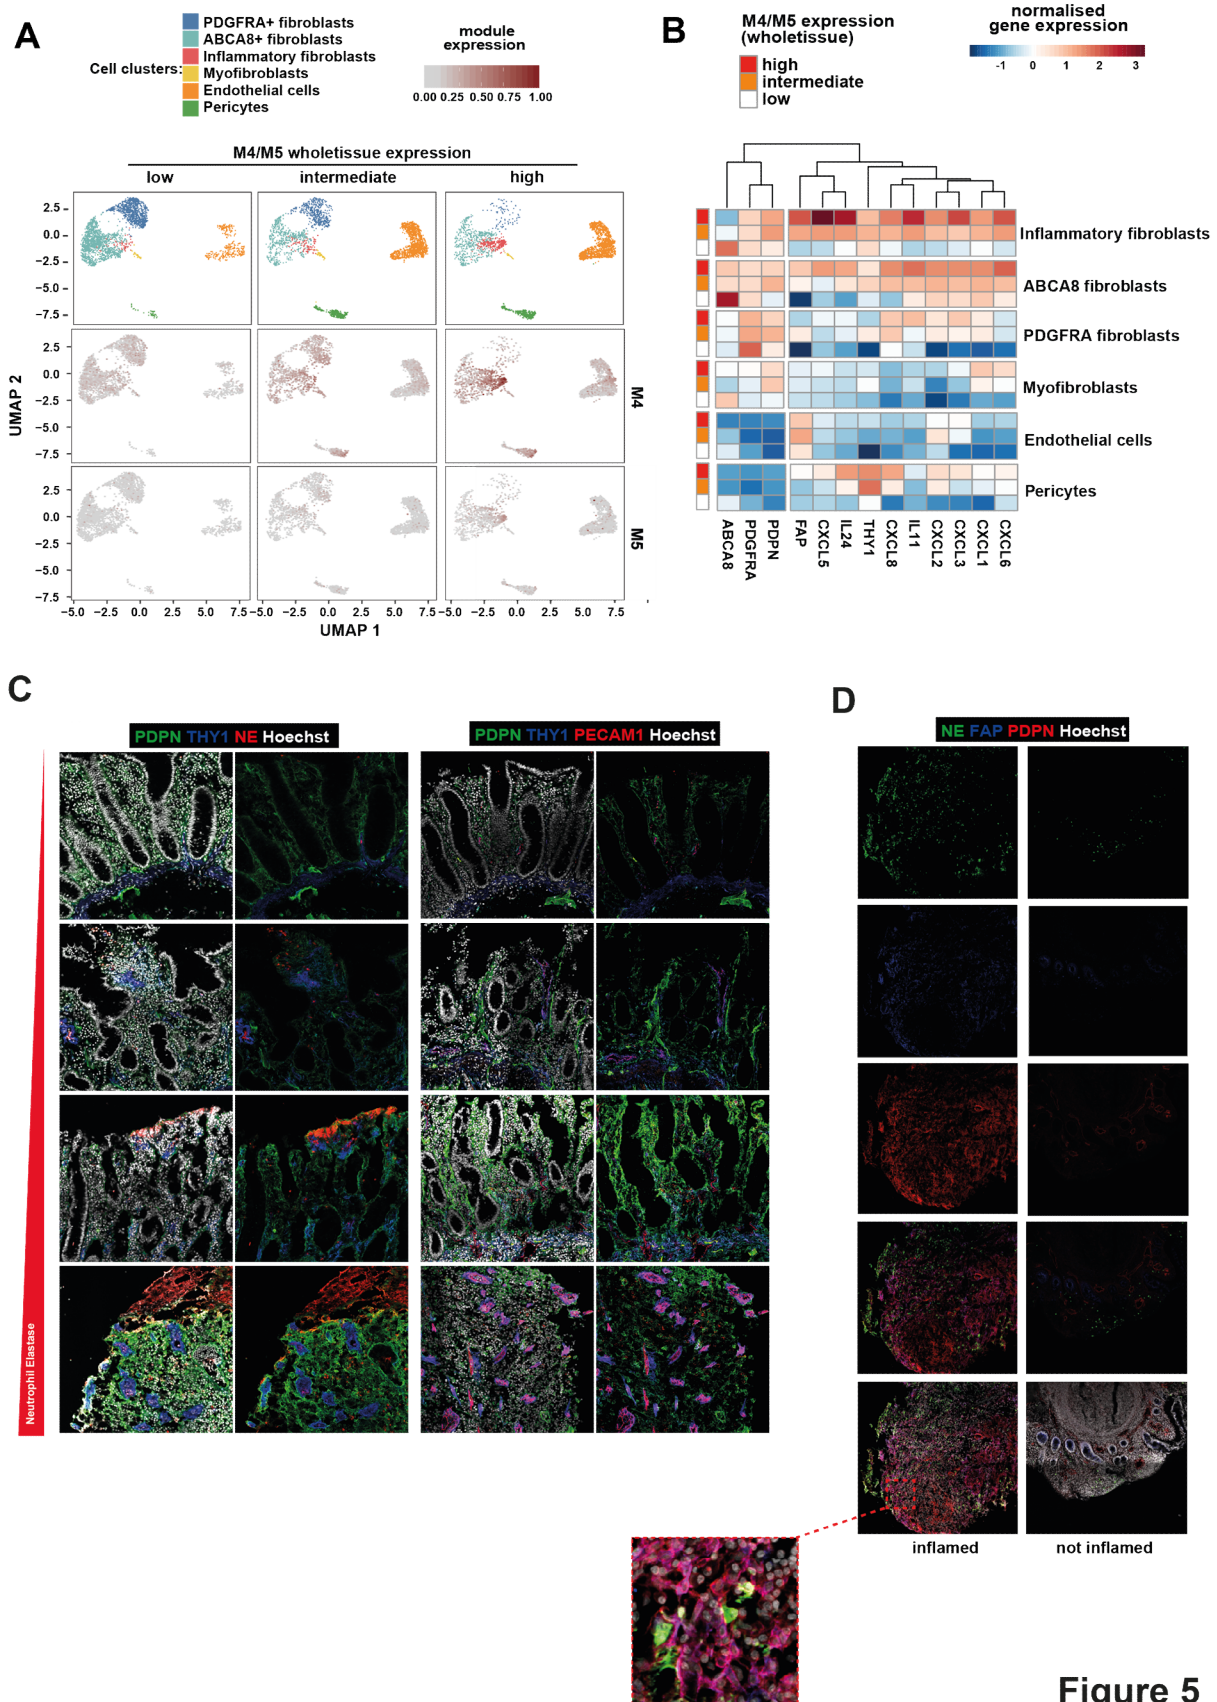

Figure 5

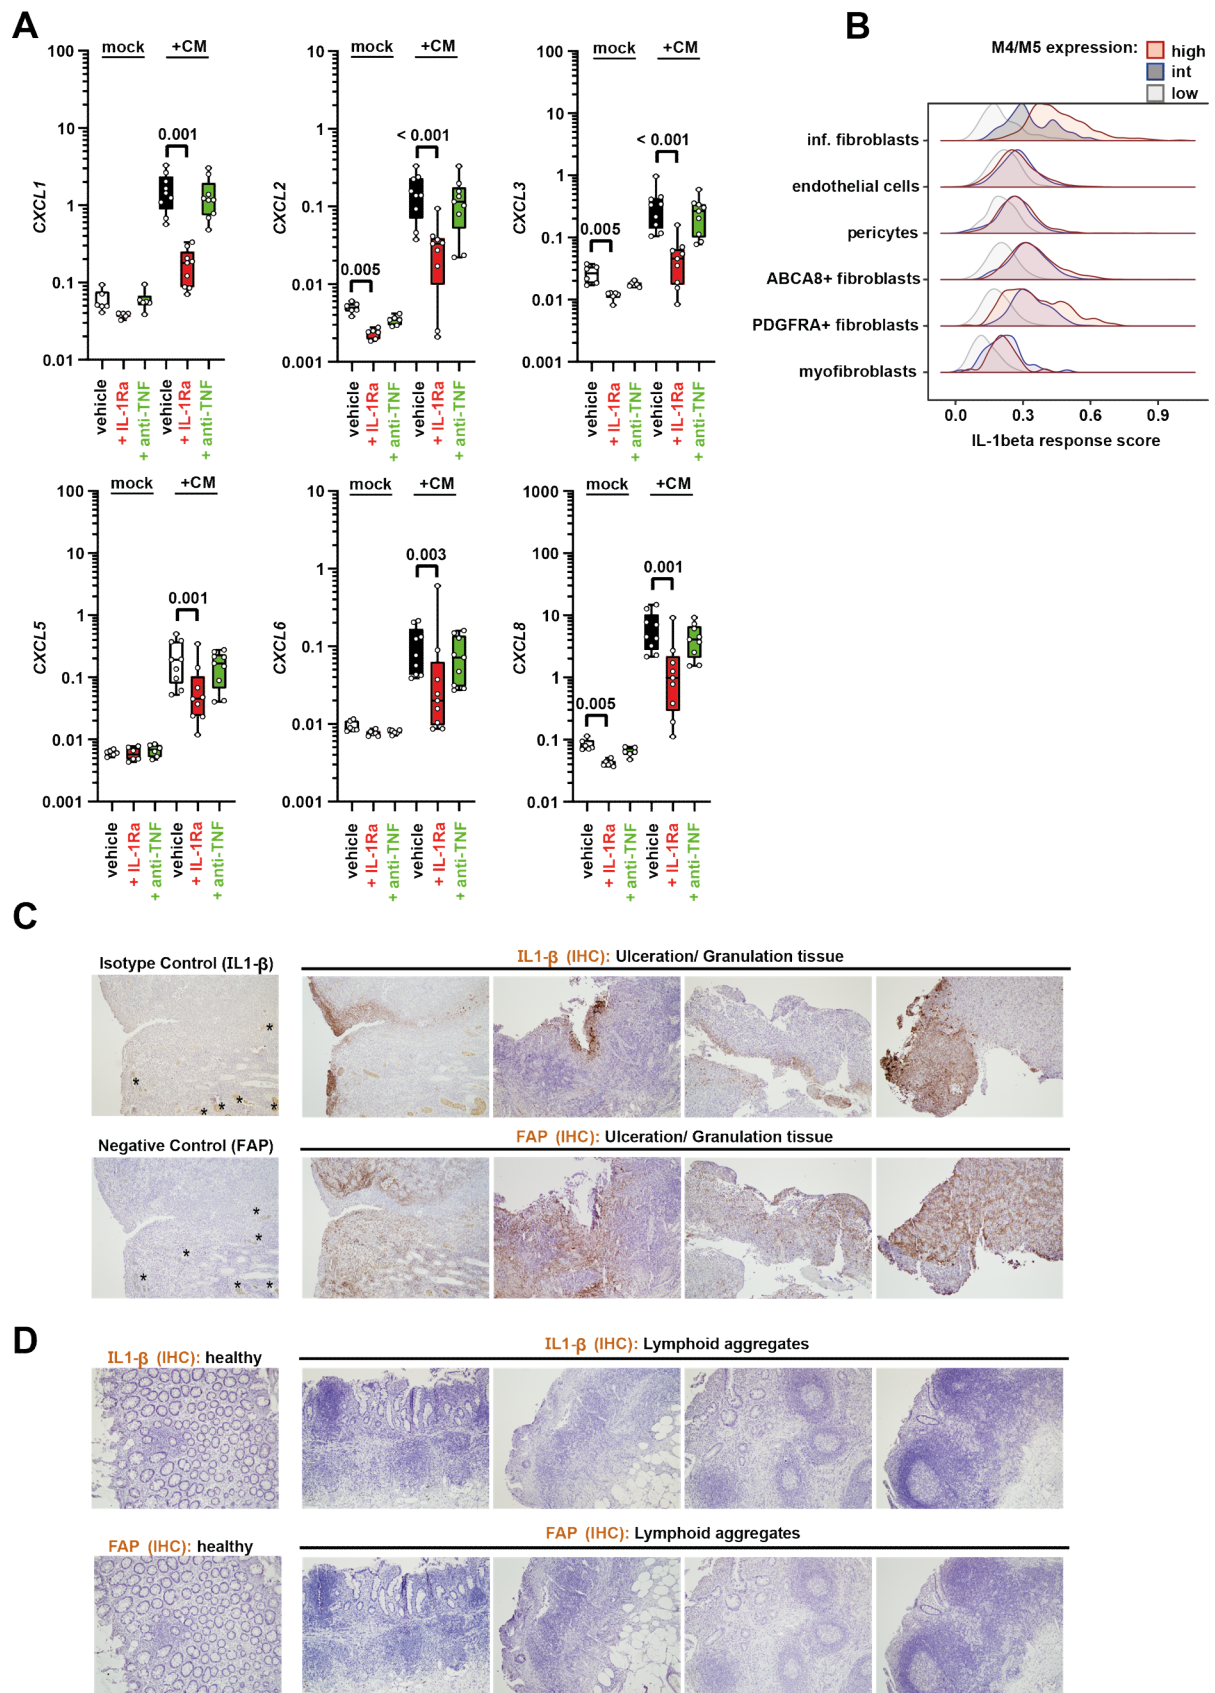

Figure 6

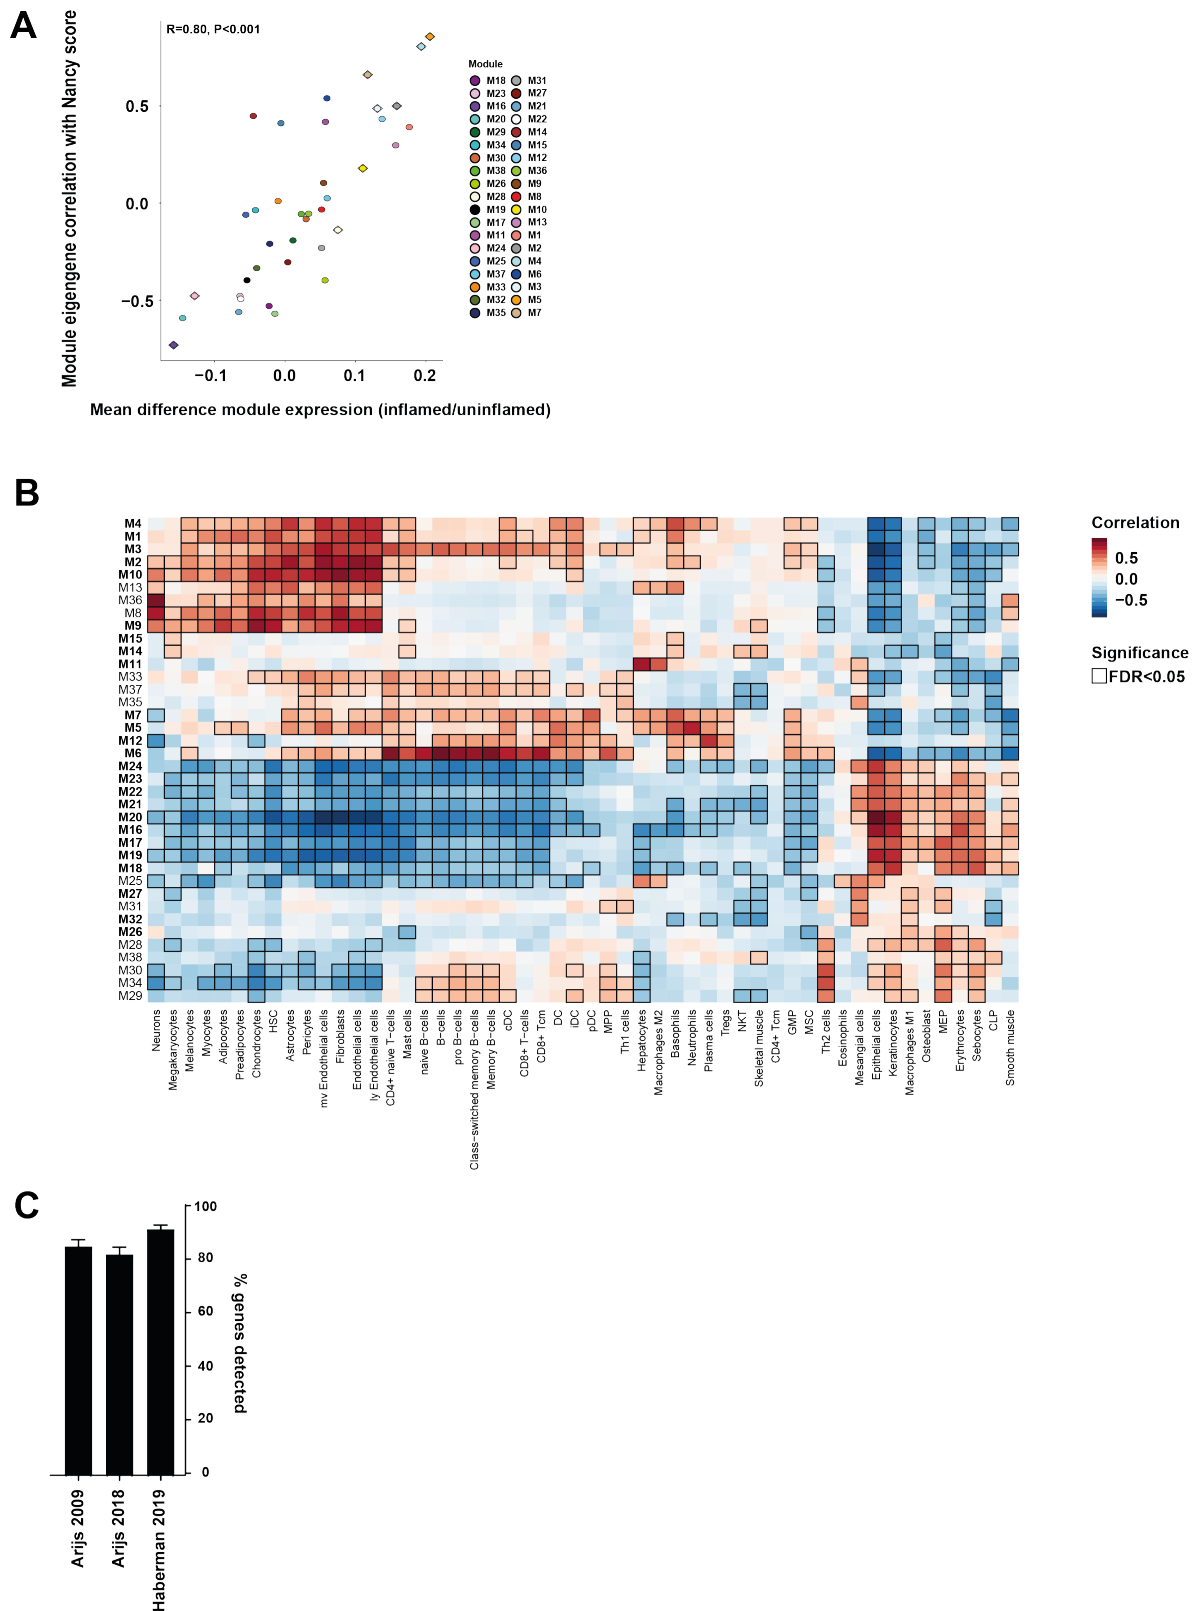

Extended Data Figure 1

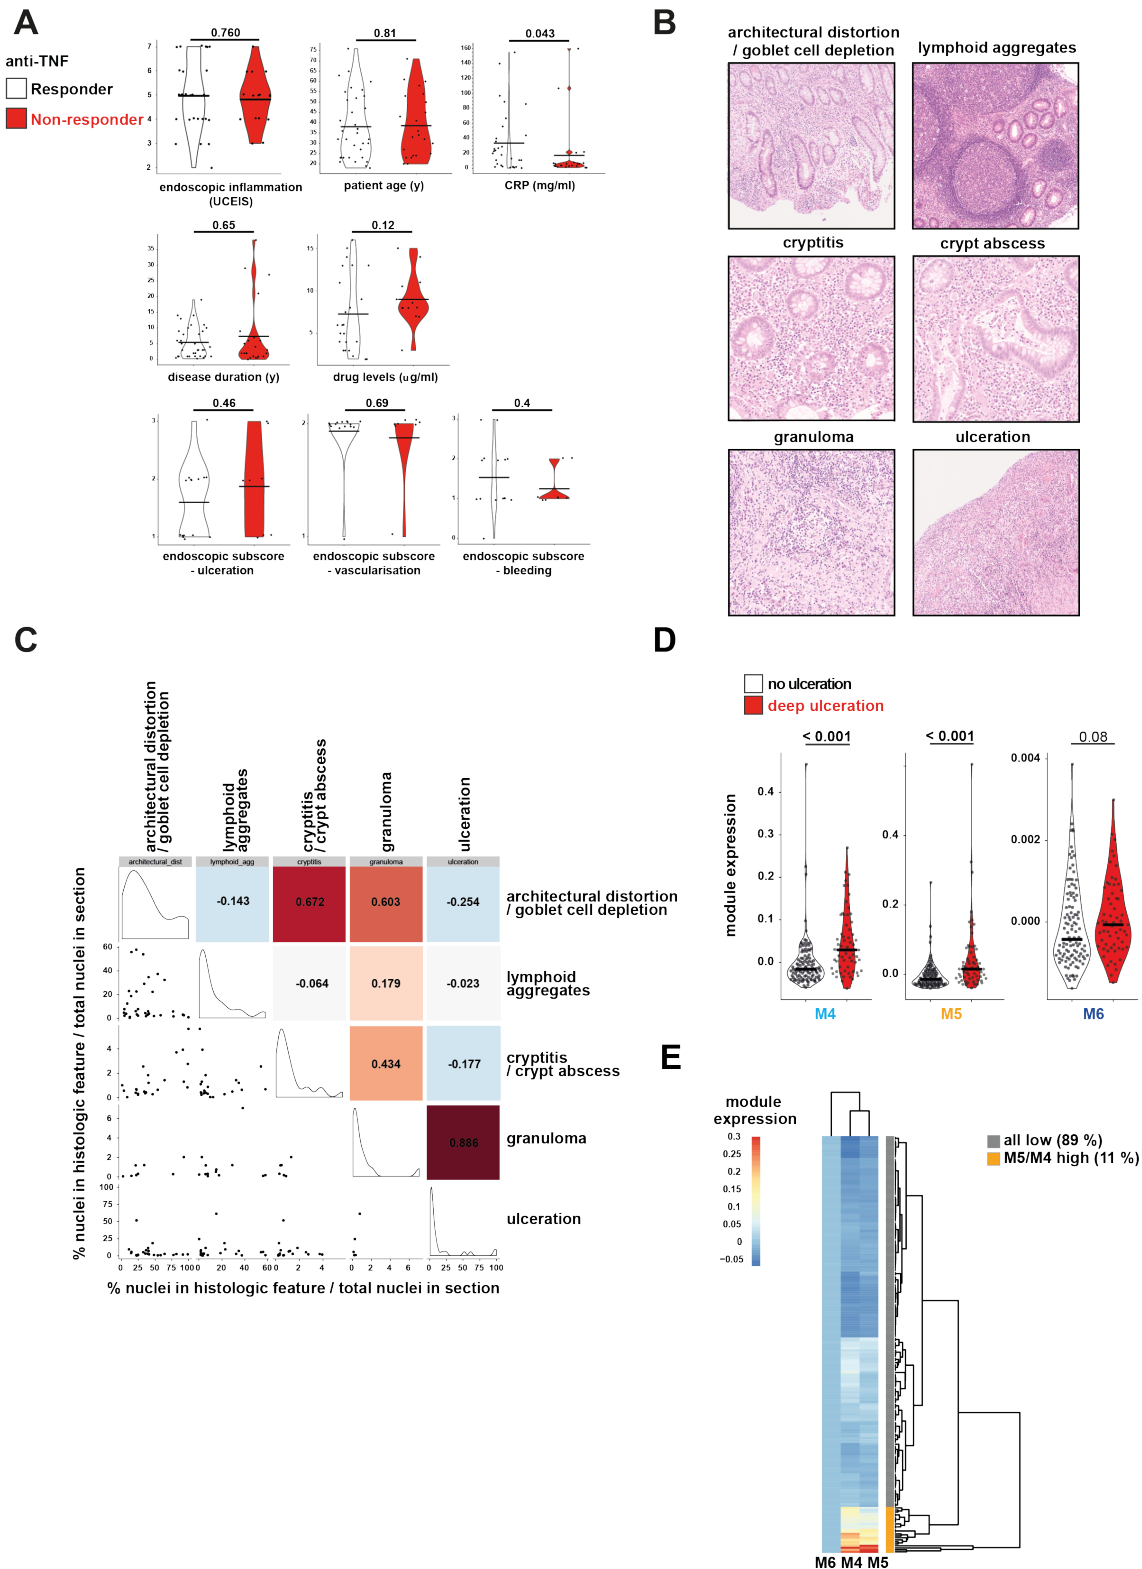

Extended Data Figure 2



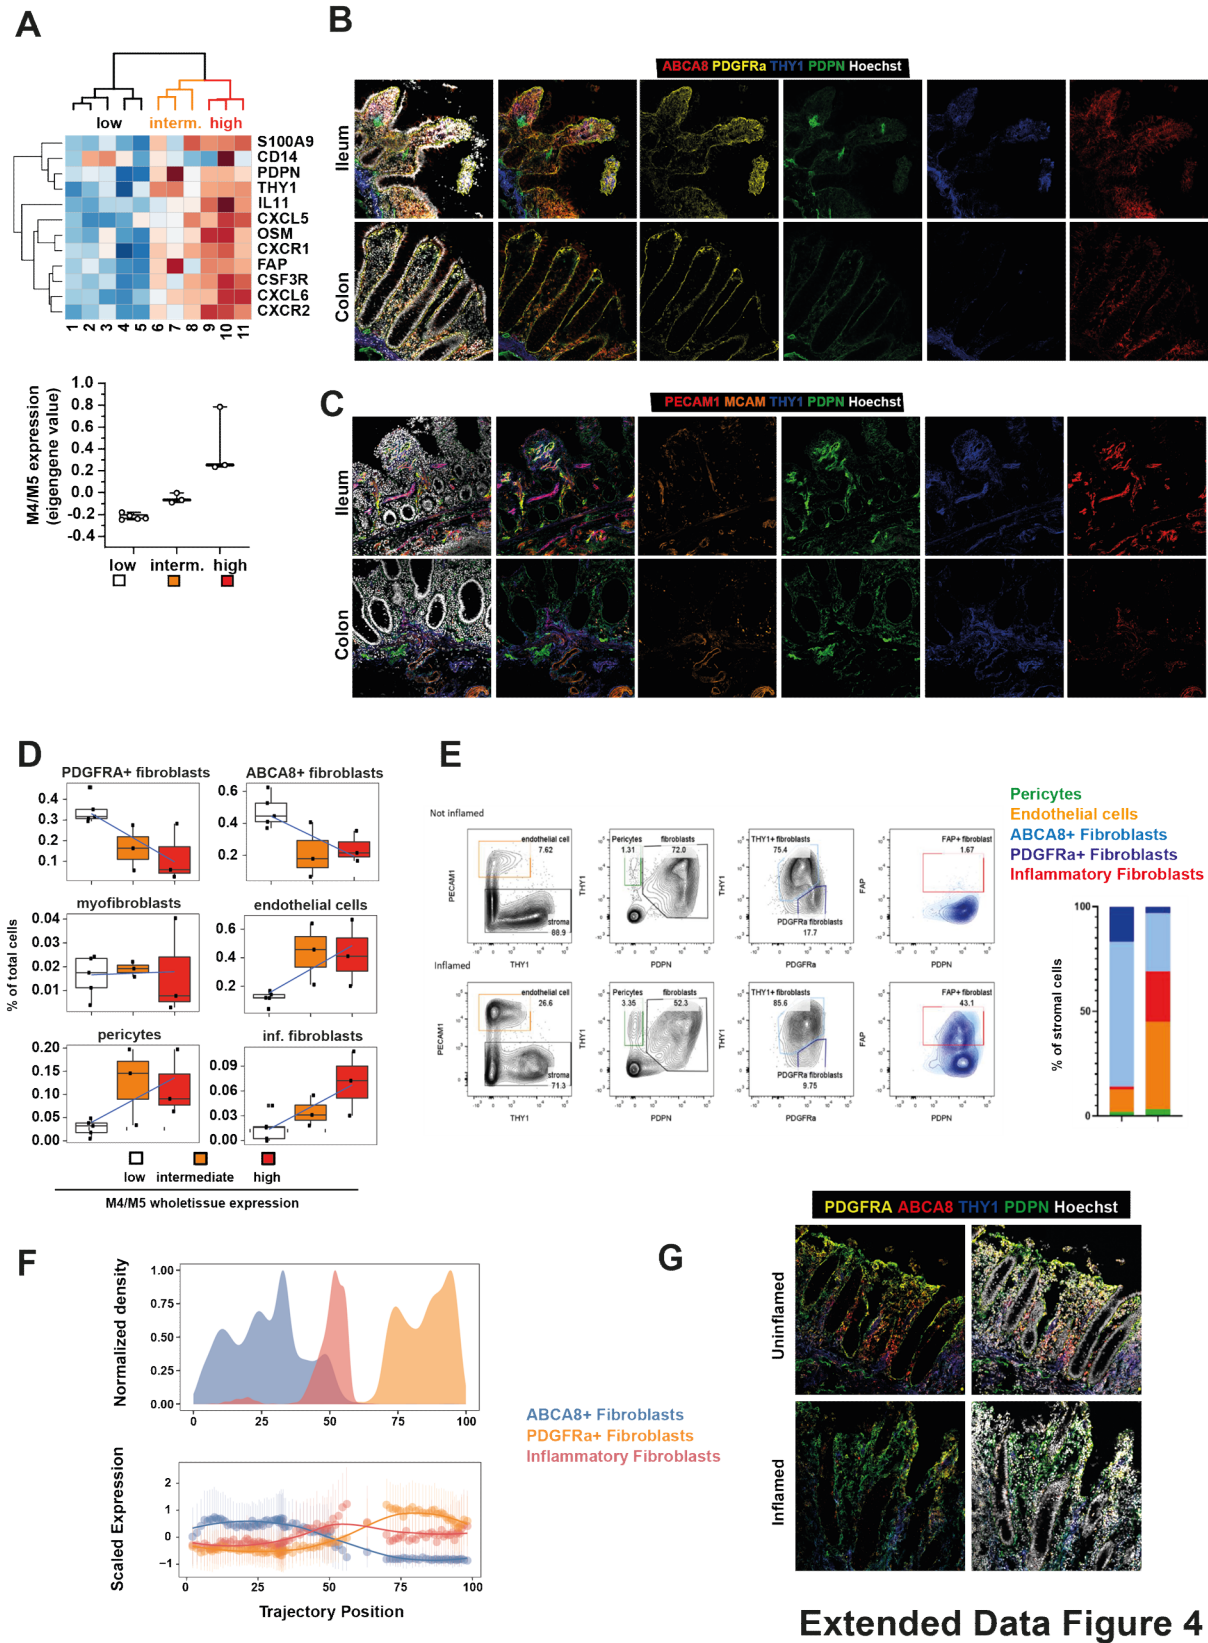



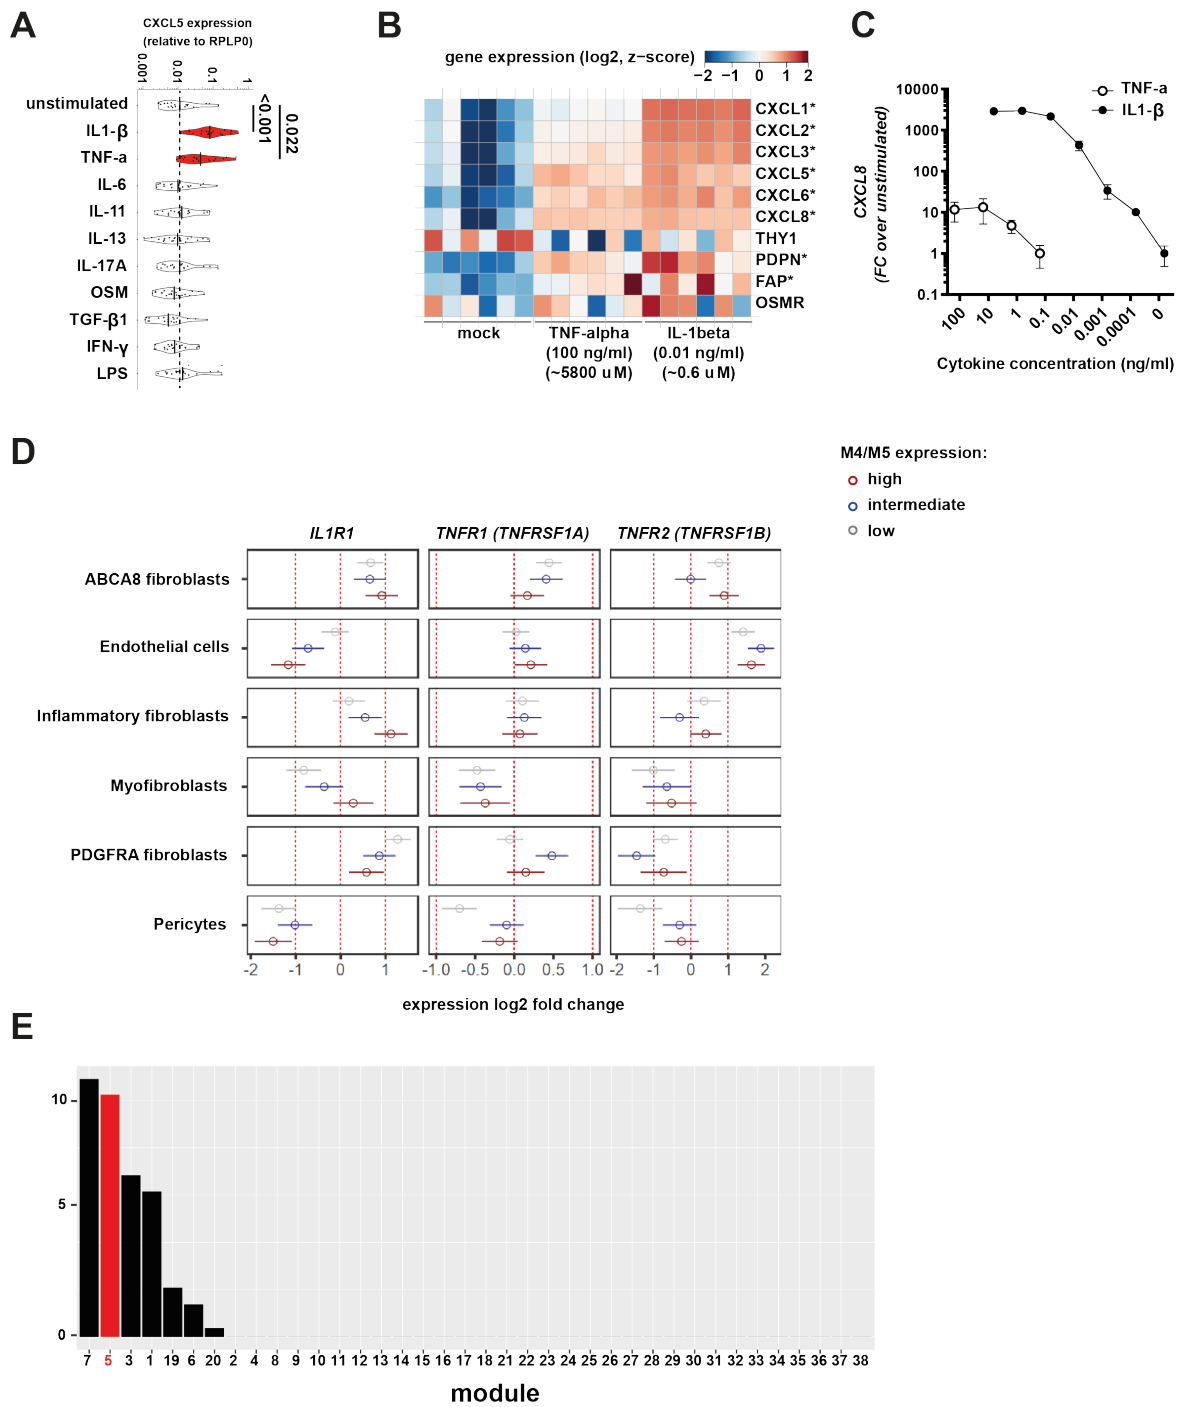

Extended Data Figure 5
